# Supplementary material for: Structures, stabilities and spectral properties of metalloborospherenes MB0/−40 (M = Cu, Ag, and Au)
Source: Royal Society of Chemistry journal article supplement (doi:10.1039/c7ra05932a), 2017-01-01
Supplement: c7ra05932a1.pdf [file c7ra05932a1.pdf]

**Structures, stabilities and spectral properties of  
metalloborospherenes  $MB_{40}^{0/-}$  (M=Cu, Ag, and Au)**

Shi-Xiong Li,<sup>\*ab</sup> Zheng-Ping Zhang,<sup>\*b</sup> Zheng-Wen Long,<sup>c</sup> and Shui-Jie Qin<sup>d</sup>

<sup>a</sup>*School of Physics and Electronic Science, Guizhou Education University, Guiyang 550018, China. E-mail: leesoptics@163.com*

<sup>b</sup>*College of Big Data and Information Engineering, Guizhou University, Guiyang 550025, China. E-mail: zpzhang@gzu.edu.cn*

<sup>c</sup>*College of Science, Guizhou University, Guiyang 550025, China*

<sup>d</sup>*Key Lab of Photoelectron Technology and Application, Guizhou University, Guiyang 550025, China*

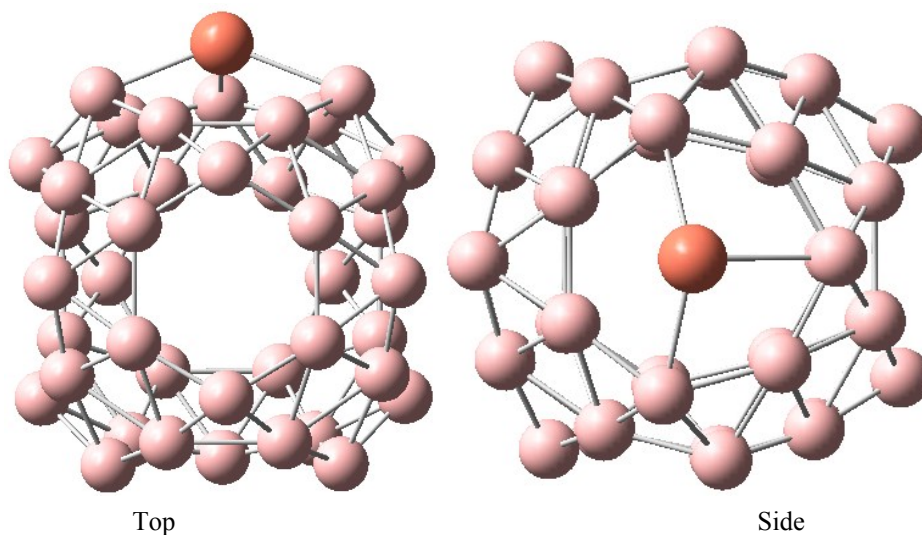

(a) Cu&B<sub>40</sub><sup>0/-</sup> path: Ly (0.00) [0.00]

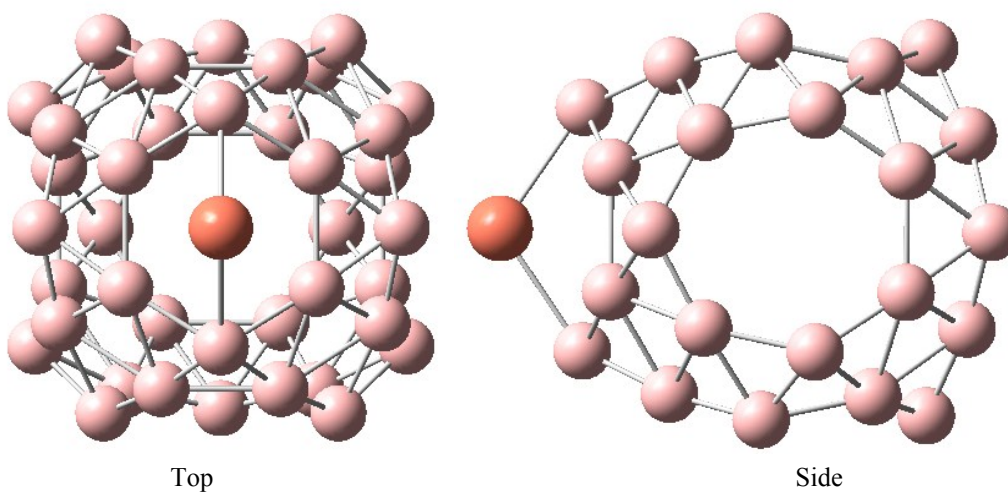

(b) Cu&B<sub>40</sub><sup>0/-</sup> path: Lz (0.33) [0.08]

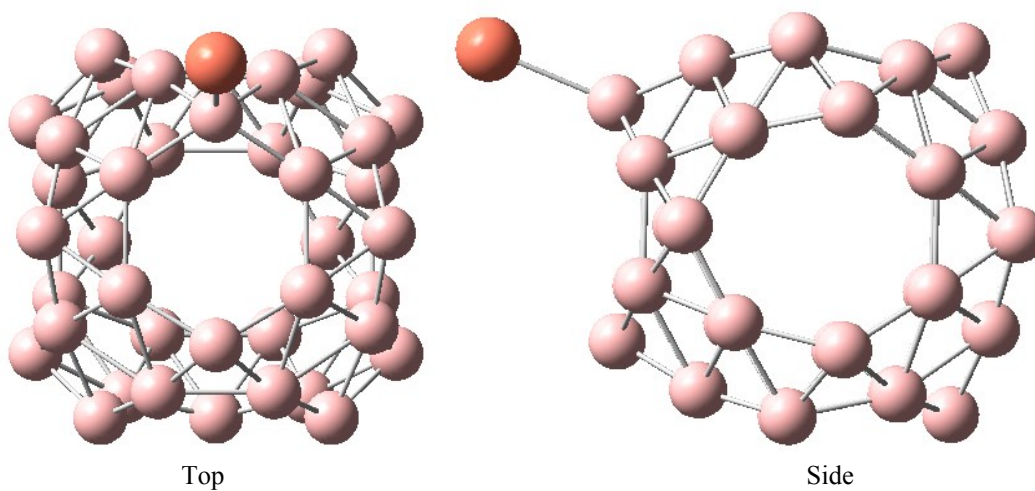

(c) Cu&B<sub>40</sub><sup>0/-</sup> path: Lyz (0.70) [0.23]

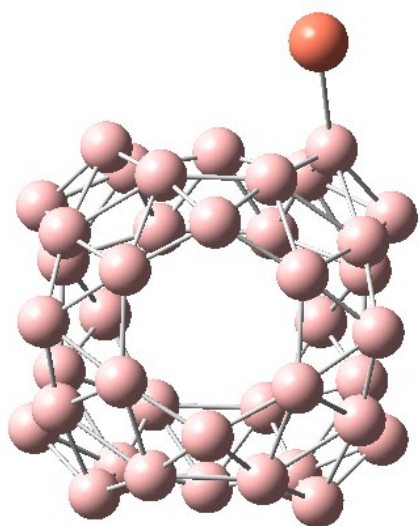

Top

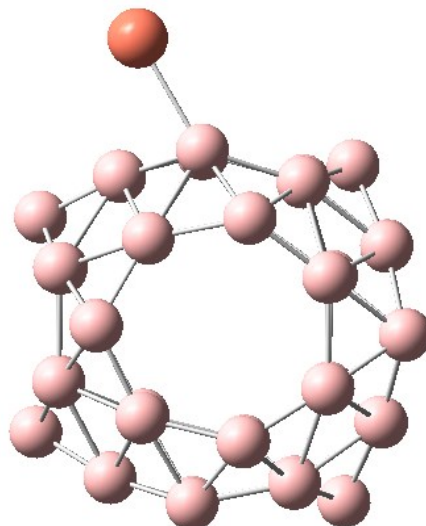

Side

(d) Cu&B<sub>40</sub> path: Lxyz (0.70)

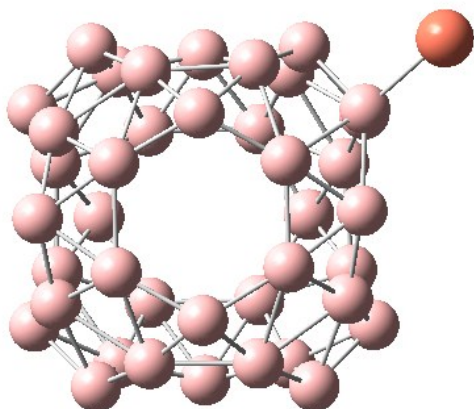

Top

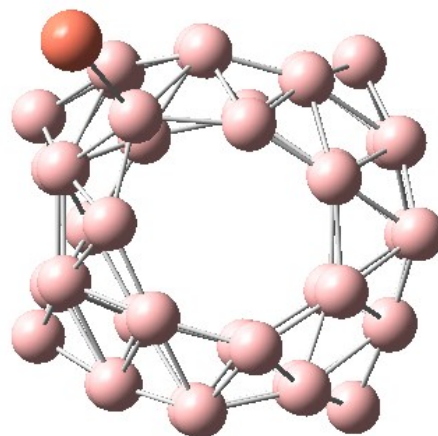

Side

(e) Cu&B<sub>40</sub><sup>-</sup> path: Lxyz [0.60]

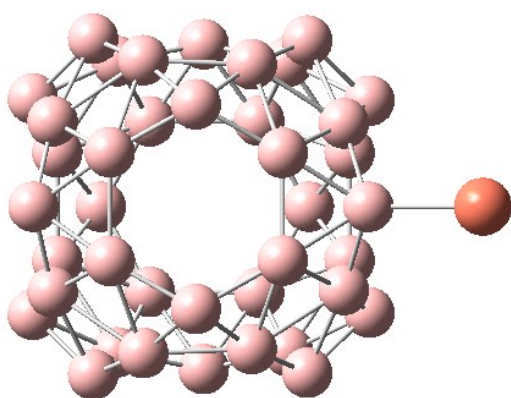

Top

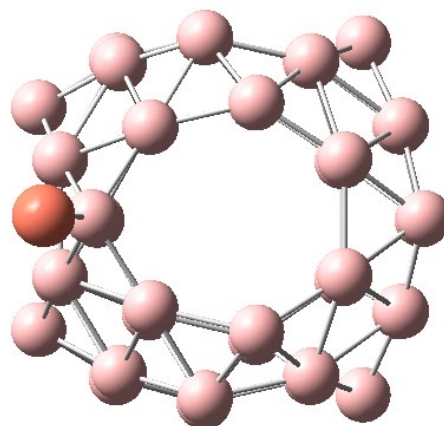

Side

(f) Cu&B<sub>40</sub><sup>0/-</sup> path: Lxz (0.81) [0.54]

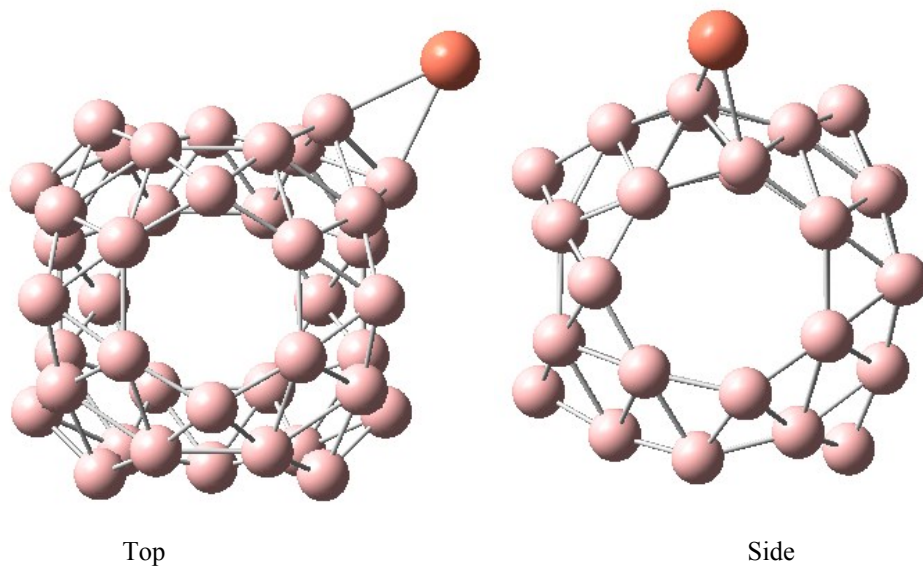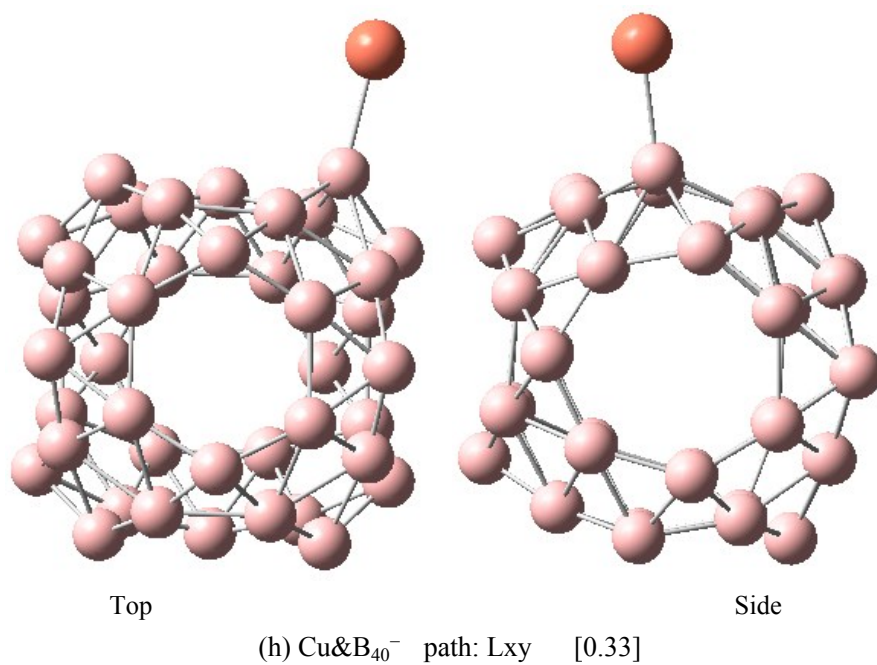

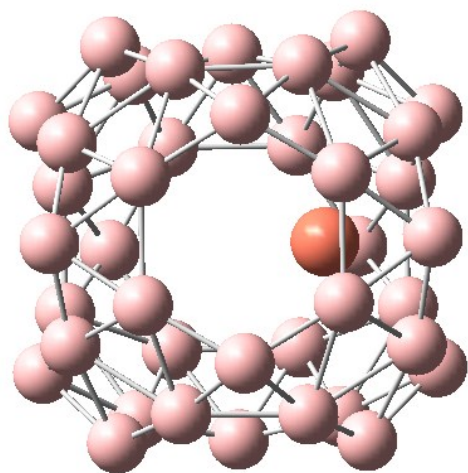

Top

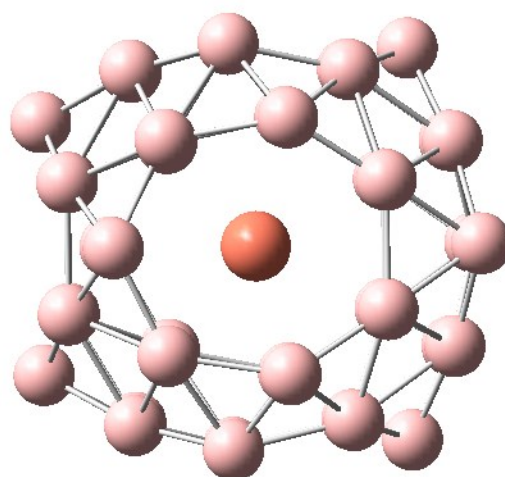

Side

(i) Cu@B<sub>40</sub><sup>0/-</sup> path: Lxz (1.04) [0.89]

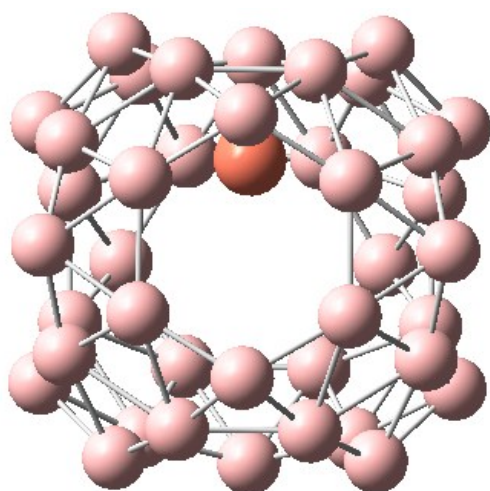

Top

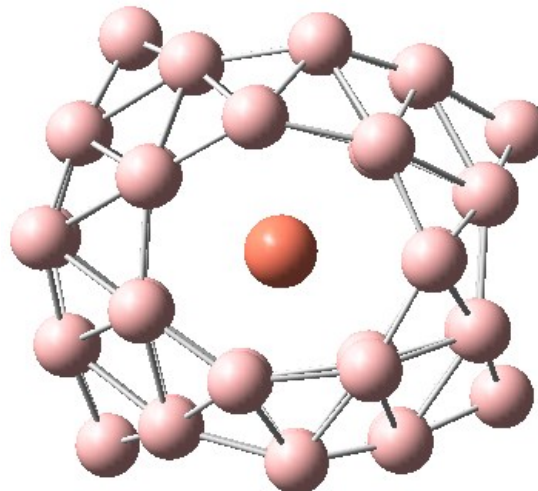

Side

(j) Cu@B<sub>40</sub><sup>0/-</sup> paths: Ly, Lyz, and Lxyz (1.04) [0.89]

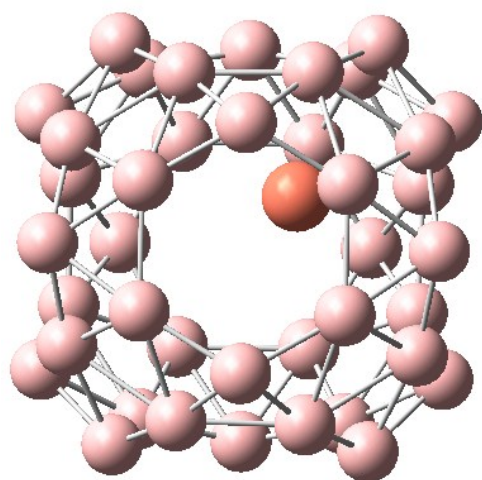

Top

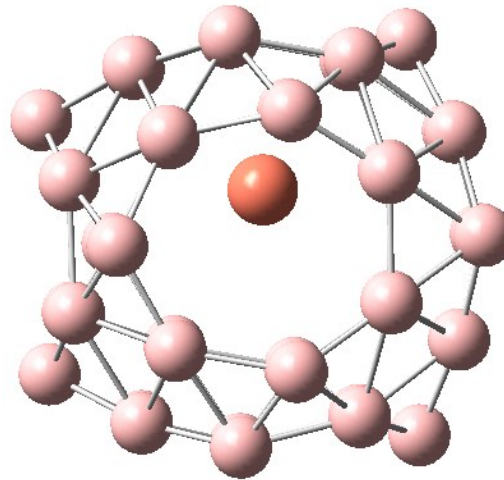

Side

(k) Cu@B<sub>40</sub><sup>0/-</sup> path: Lxy (1.15) [1.04]

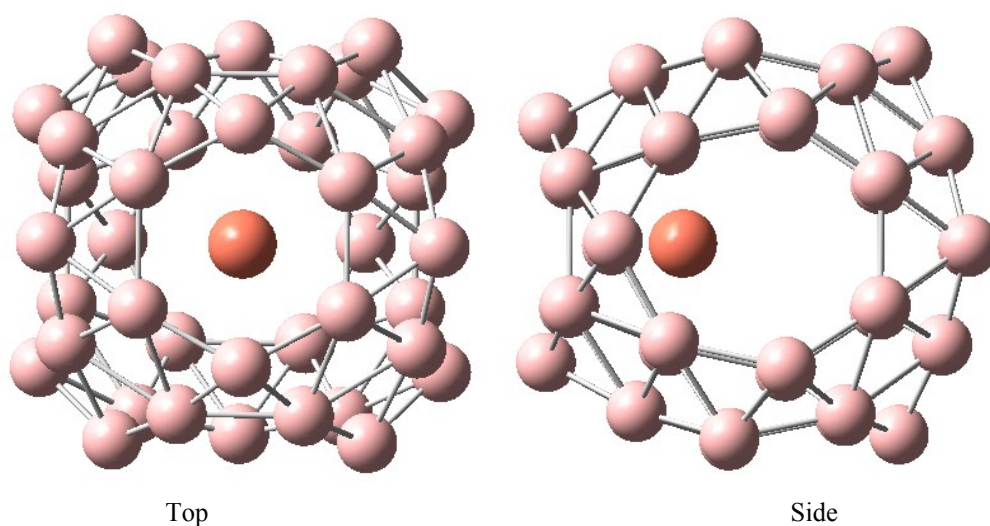

(1)  $\text{Cu@B}_{40}^{0/-}$  path: Lz (1.27) [1.15]

Fig. S1 Optimized structures of metalloborospherenes  $\text{CuB}_{40}^{0/-}$  for the two local minima (one corresponds to the endohedral  $\text{Cu@B}_{40}^{0/-}$ , another corresponds to the exohedral  $\text{Cu@B}_{40}^{0/-}$ ) in the six paths. The round brackets denote the relative energies (eV) of neutral metalloborospherenes  $\text{CuB}_{40}$ , the square brackets denote the relative energies (eV) of anionic metalloborospherenes  $\text{CuB}_{40}^-$ .

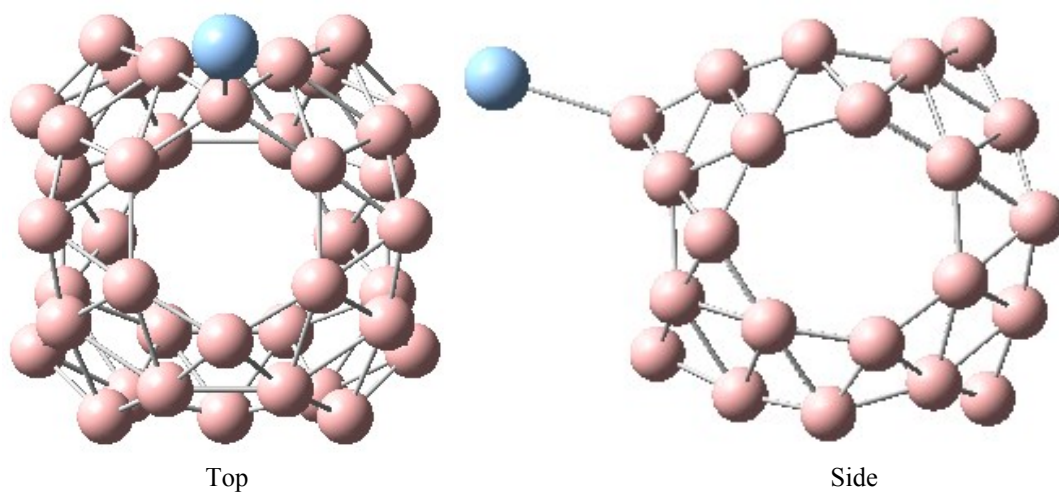

(a) Ag&B<sub>40</sub><sup>0/-</sup> path: Lyz (0.00) [0.00]

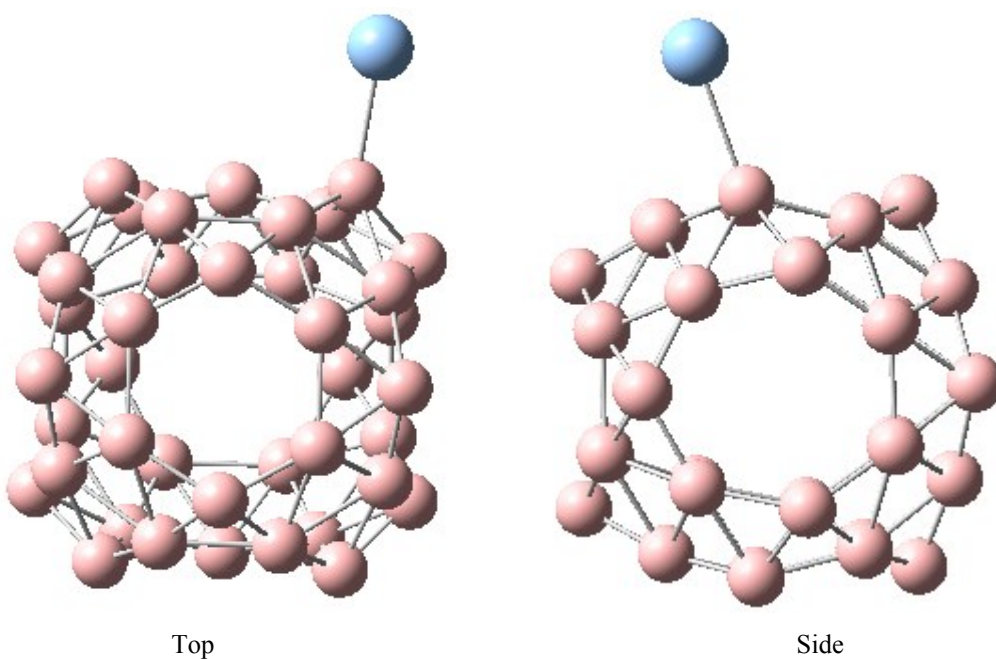

(b) Ag&B<sub>40</sub> path: Lxyz (0.07)

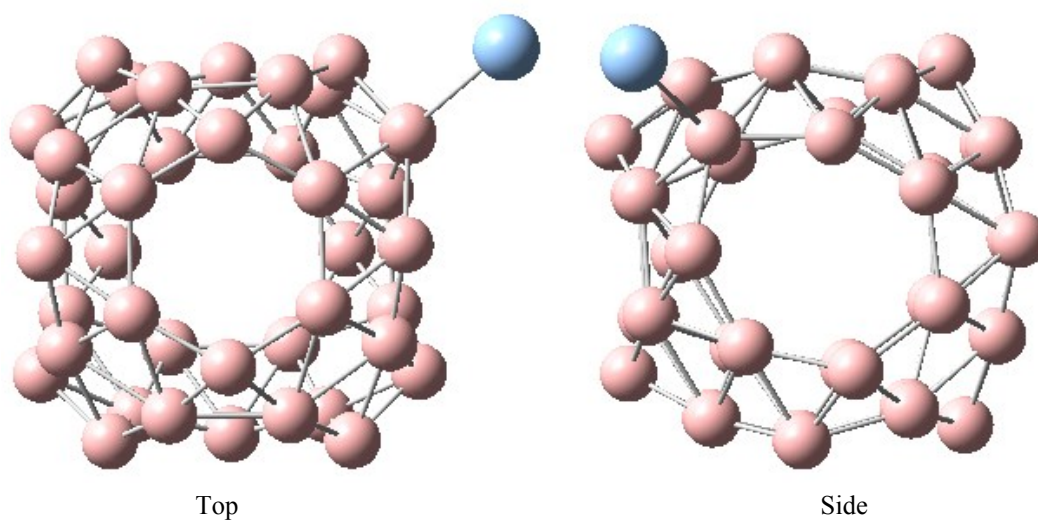

(c) Ag&B<sub>40</sub><sup>-</sup> path: Lxyz [0.39]

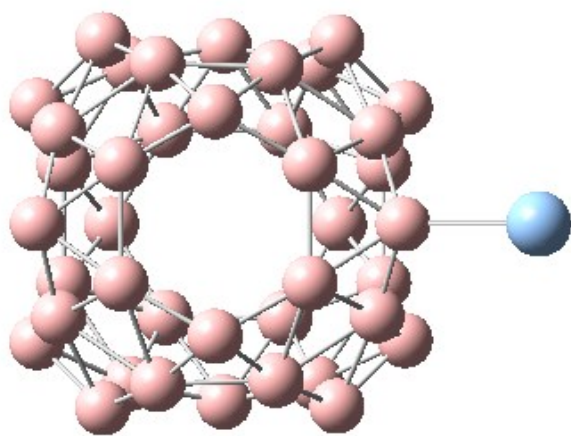

Top

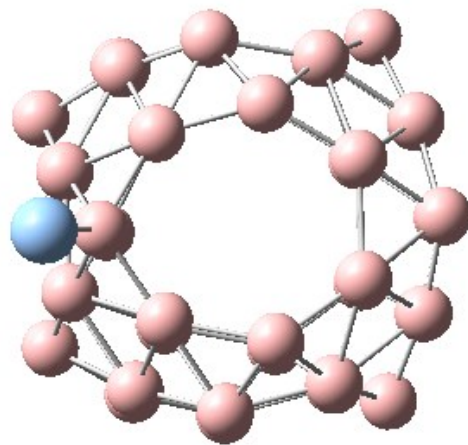

Side

(d) Ag&B<sub>40</sub><sup>0/-</sup> path: Lxz (0.10) [0.31]

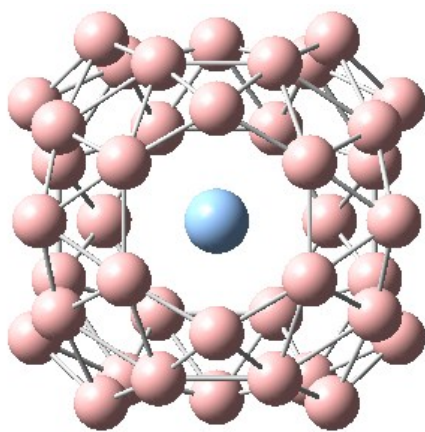

Top

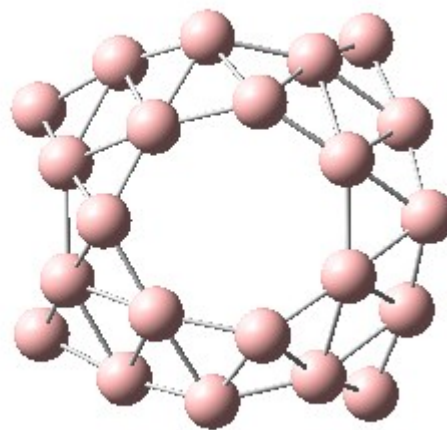

Side

(e) Ag&B<sub>40</sub><sup>0/-</sup> path: Lz (0.22) [0.31]

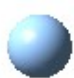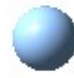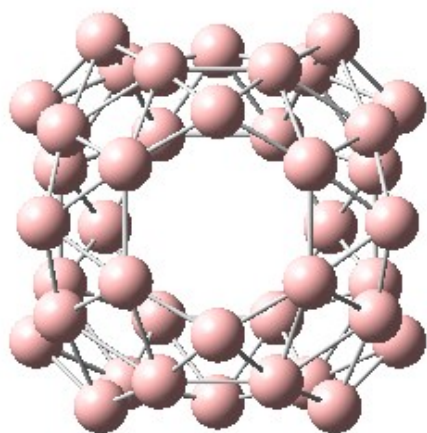

Top

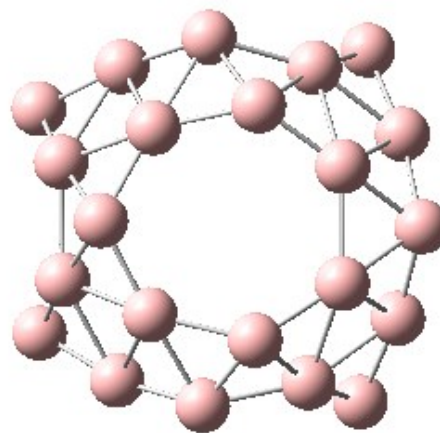

Side

(f) Ag&B<sub>40</sub><sup>0/-</sup> path: Ly (0.22) [0.50]



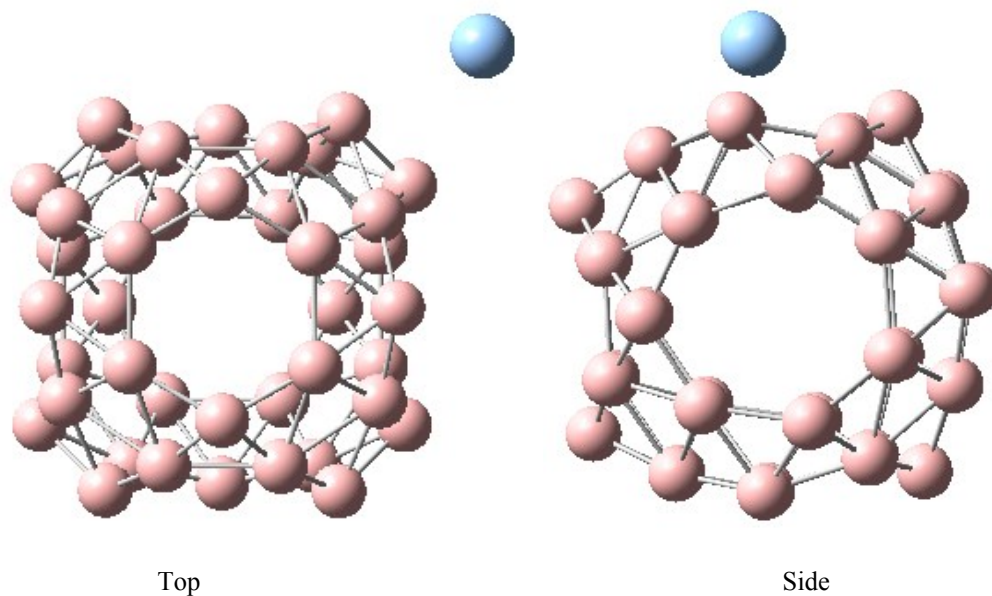

(g)  $\text{Ag}\&\text{B}_{40}^{0-}$  path: Lxy (0.39) [0.84]

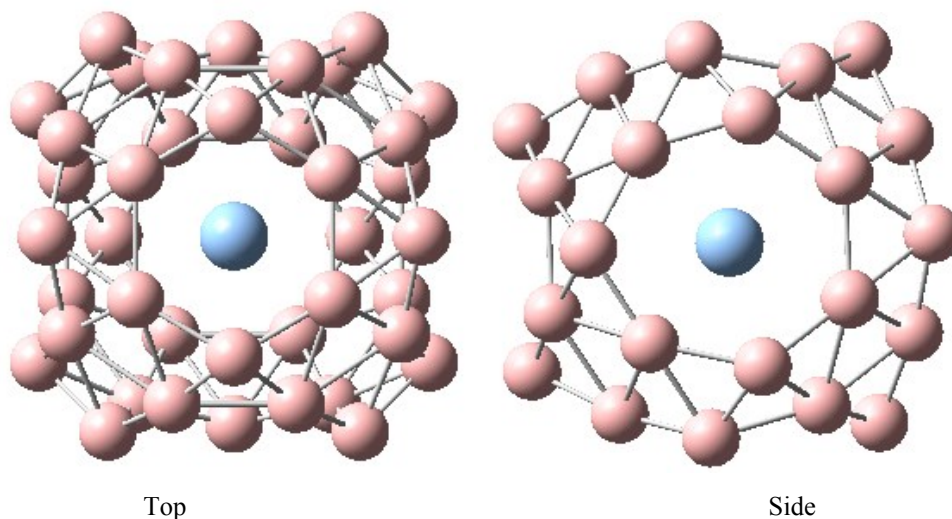

(h)  $\text{Ag}\@\text{B}_{40}^{0-}$  paths: Ly, Lz, Lxy, Lxz, Lyz, and Lxyz (1.19) [1.53]

Fig. S2 Optimized structures of metalloborospherenes  $\text{AgB}_{40}^{0-}$  for the two local minima (one corresponds to the endohedral  $\text{Ag}\&\text{B}_{40}^{0-}$ , another corresponds to the exohedral  $\text{Ag}\@\text{B}_{40}^{0-}$ ) in the six paths. The round brackets denote the relative energies (eV) of neutral metalloborospherenes  $\text{AgB}_{40}$ , the square brackets denote the relative energies (eV) of anionic metalloborospherenes  $\text{AgB}_{40}^-$ .

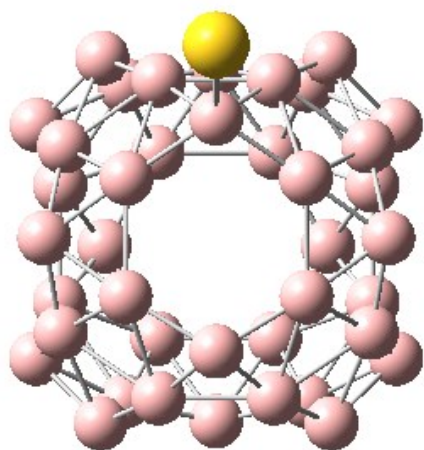

Top

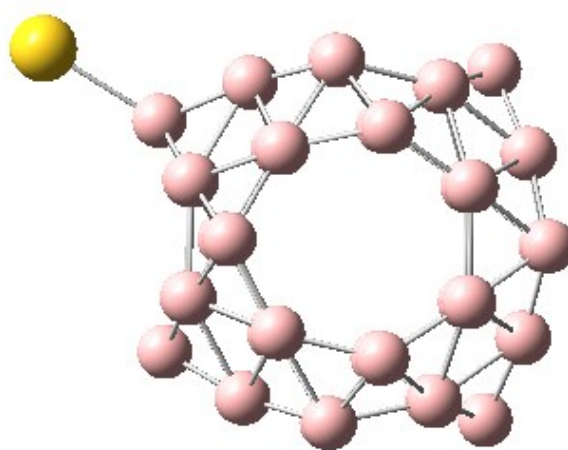

Side

(a) Au&B<sub>40</sub><sup>0/-</sup> path: Lyz (0.00) [0.00]

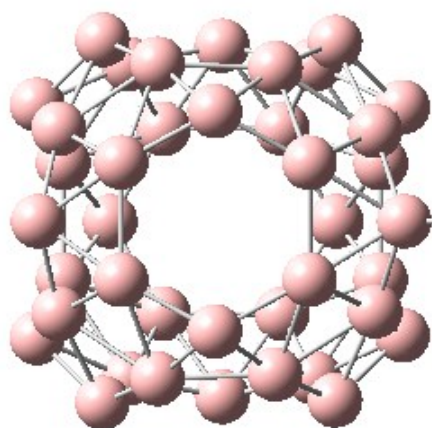

Top

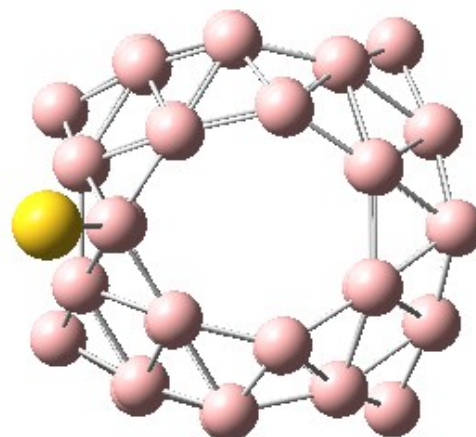

Side

(b) Au&B<sub>40</sub><sup>0/-</sup> path: Lxz (0.04) [0.22]

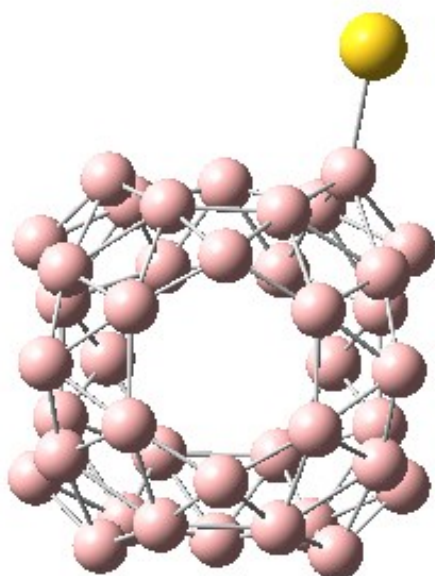

Top

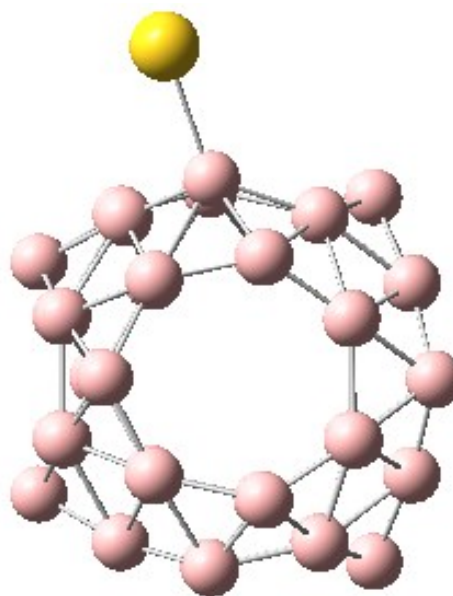

Side

(c) Au&B<sub>40</sub> path: Lxyz (0.06)

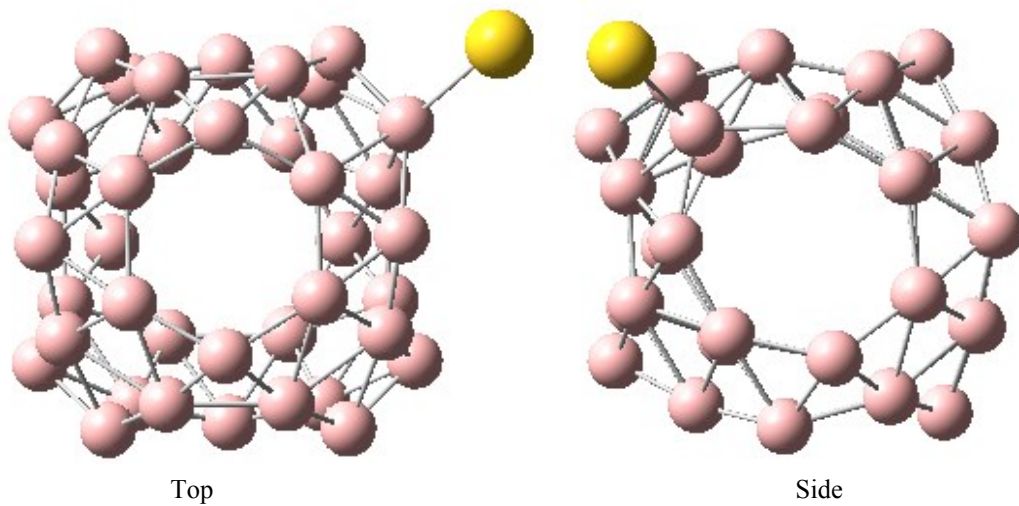

(d) Au&B<sub>40</sub><sup>-</sup> path: Lxyz [0.28]

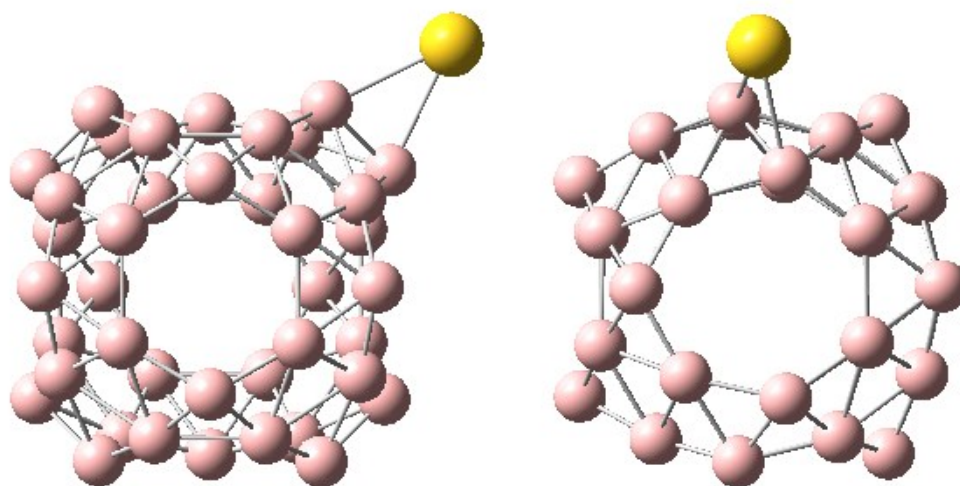

(e) Au&B<sub>40</sub><sup>0/-</sup> path: Lxy (0.24) [0.76]

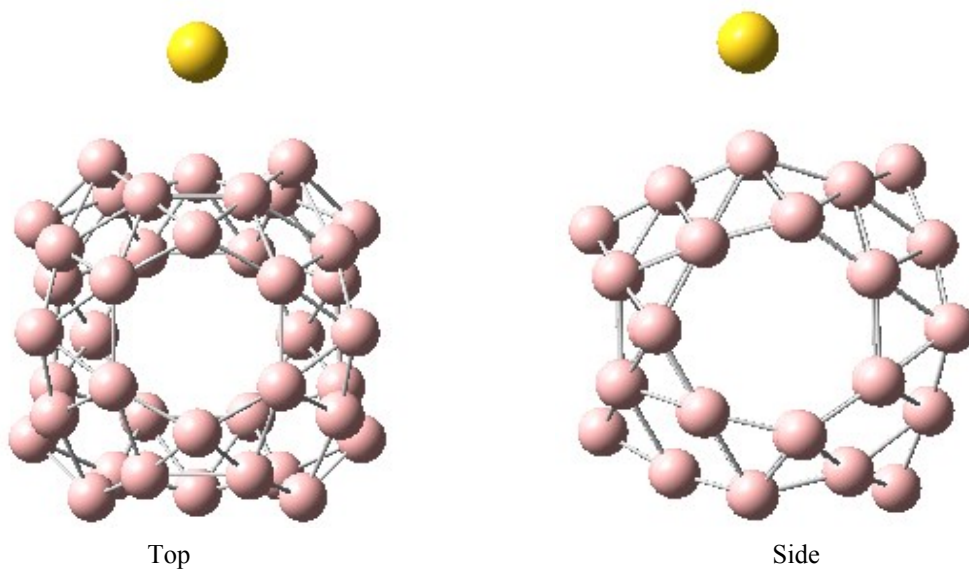

(f) Au&B<sub>40</sub><sup>0/-</sup> path: Ly (0.73) [1.05]

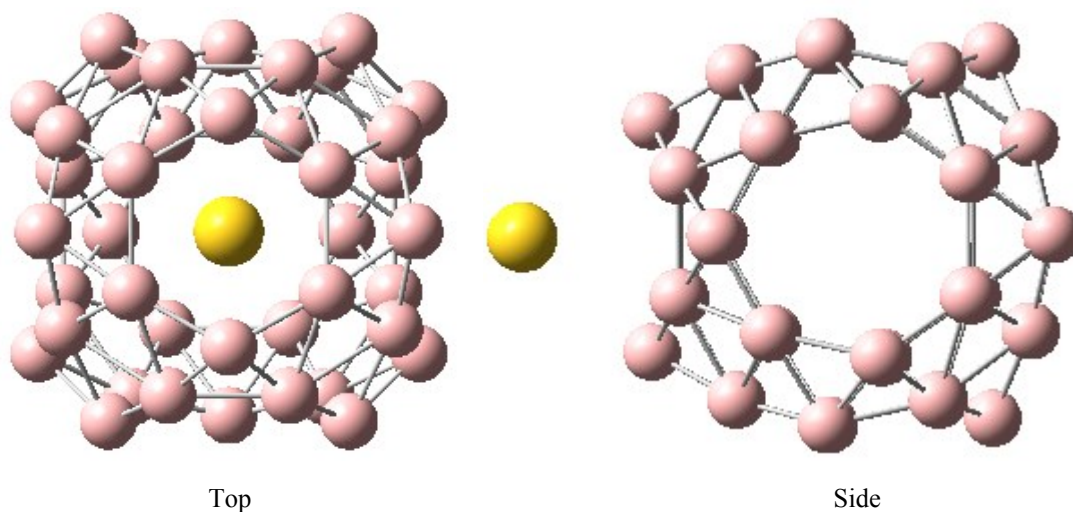

(g) Au&B<sub>40</sub><sup>0-</sup> path: Lz (0.87) [1.03]

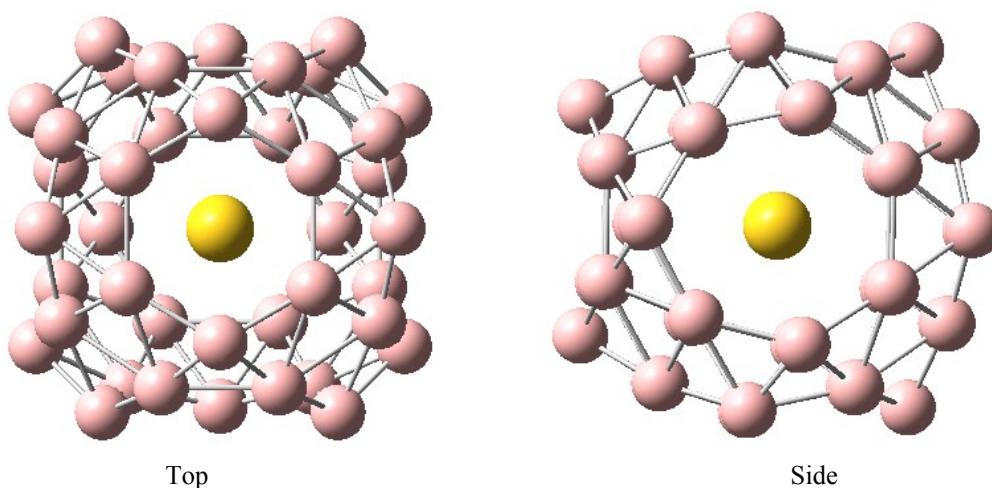

(h) Au@B<sub>40</sub> paths: Ly, Lz, Lxy, Lxz, Lyz, and Lxyz (2.50)

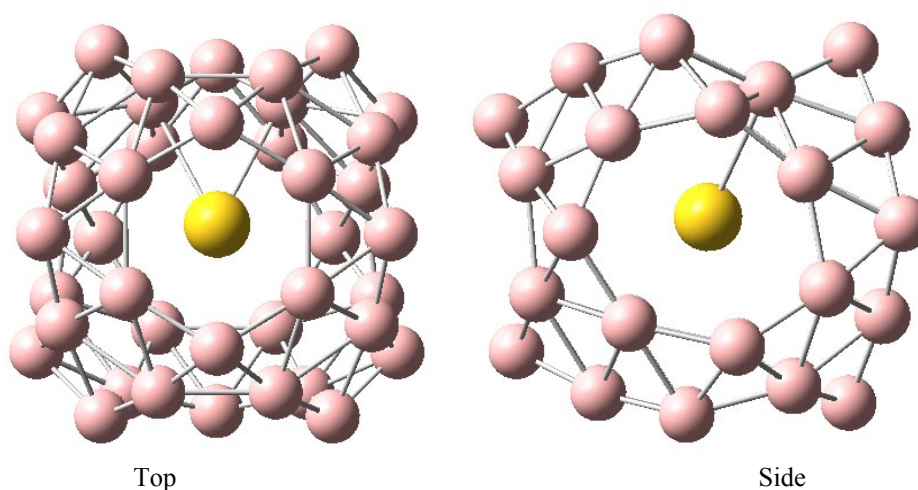

(i) Au@B<sub>40</sub><sup>-</sup> paths: Lyz and Lxyz [2.90]

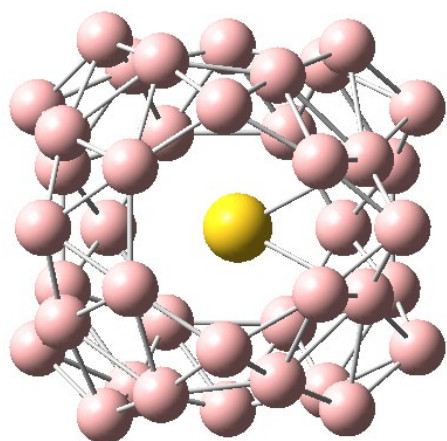

Top

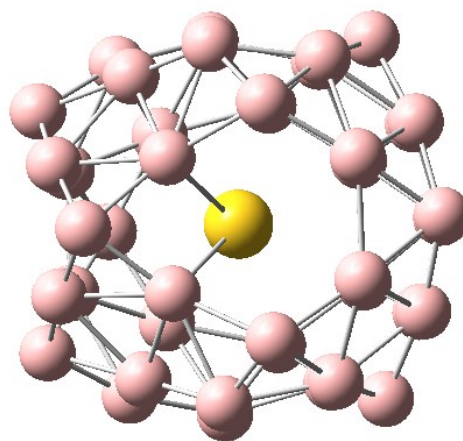

Side

(j) Au@B<sub>40</sub><sup>-</sup> path: Lxz [2.90]

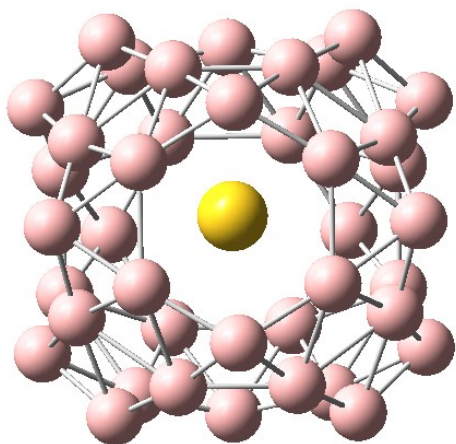

Top

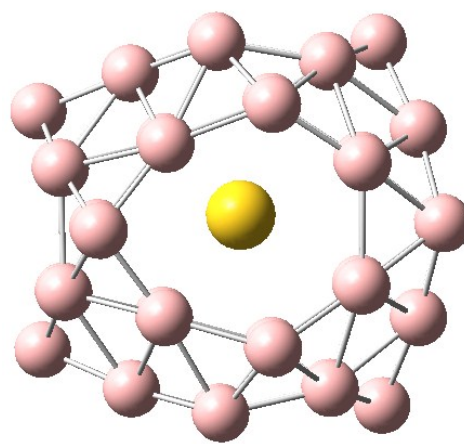

Side

(k) Au@B<sub>40</sub><sup>-</sup> path: Ly [3.18]

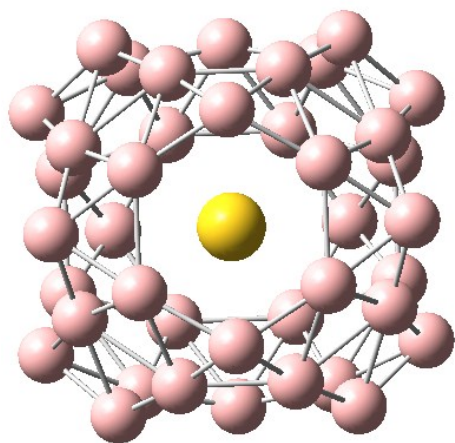

Top

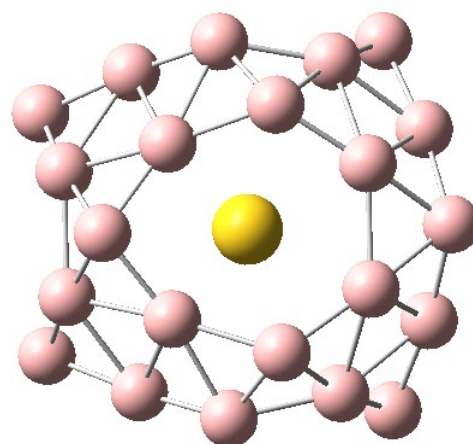

Side

(l) Au@B<sub>40</sub><sup>-</sup> path: Lz [3.20]

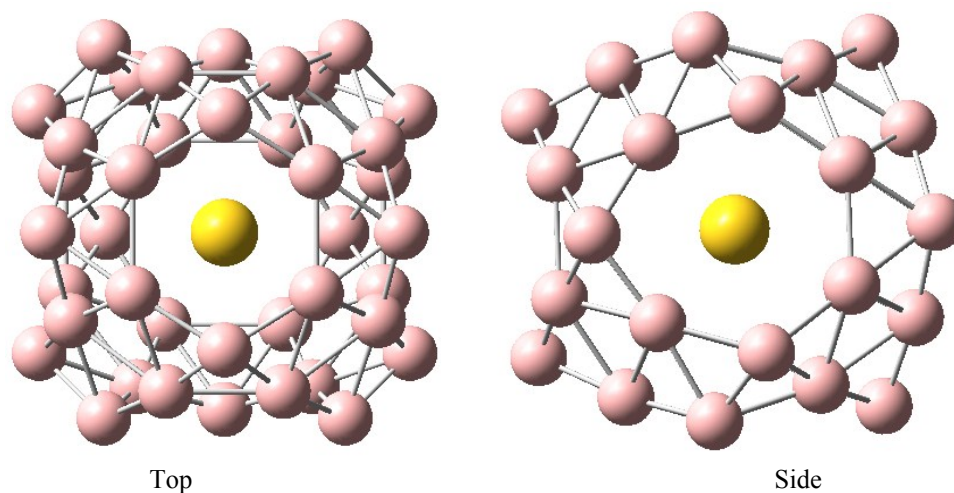

(m) Au@B<sub>40</sub><sup>-</sup> path: Lxy [3.37]

Fig. S3 Optimized structures of metalloborospherenes AuB<sub>40</sub><sup>0/-</sup> for the two local minima (one corresponds to the endohedral Au&B<sub>40</sub><sup>0/-</sup>, another corresponds to the exohedral Au@B<sub>40</sub><sup>0/-</sup>) in the six paths. The round brackets denote the relative energies (eV) of neutral metalloborospherenes AuB<sub>40</sub>, the square brackets denote the relative energies (eV) of anionic metalloborospherenes AuB<sub>40</sub><sup>-</sup>.

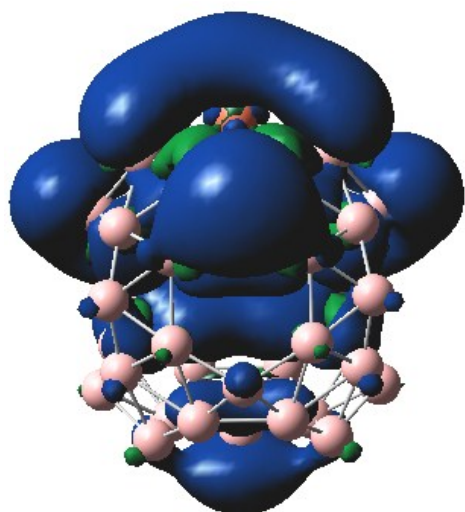

Top

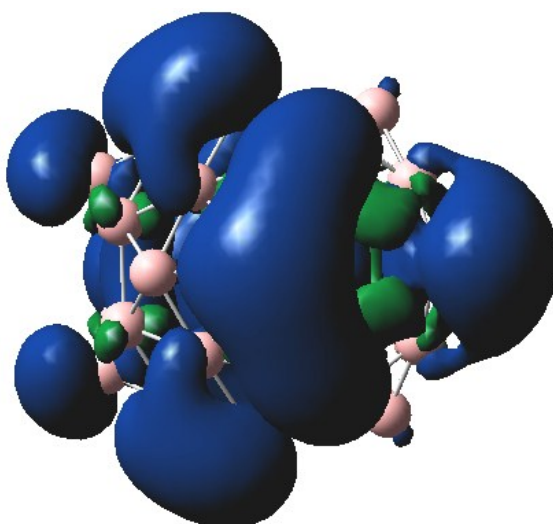

Side

(a)

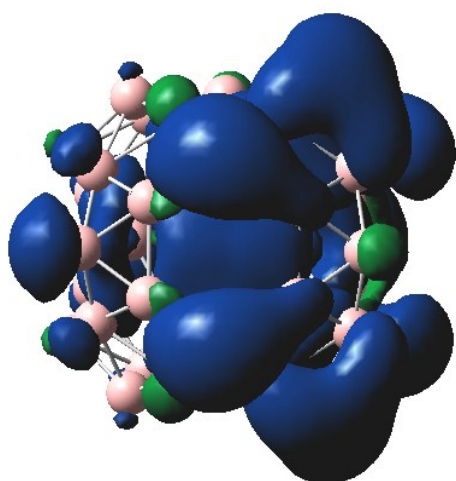

Top

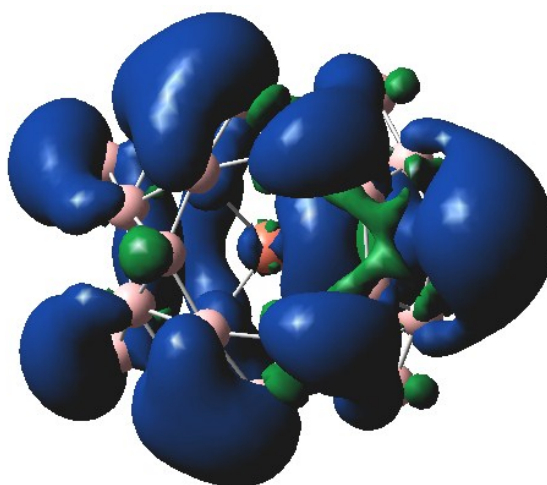

Side

(b)

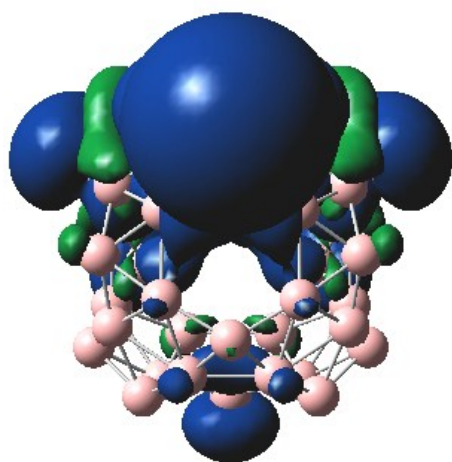

Top

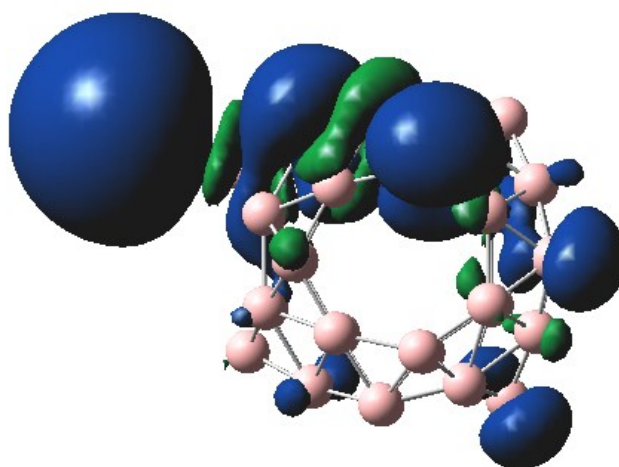

Side

(c)

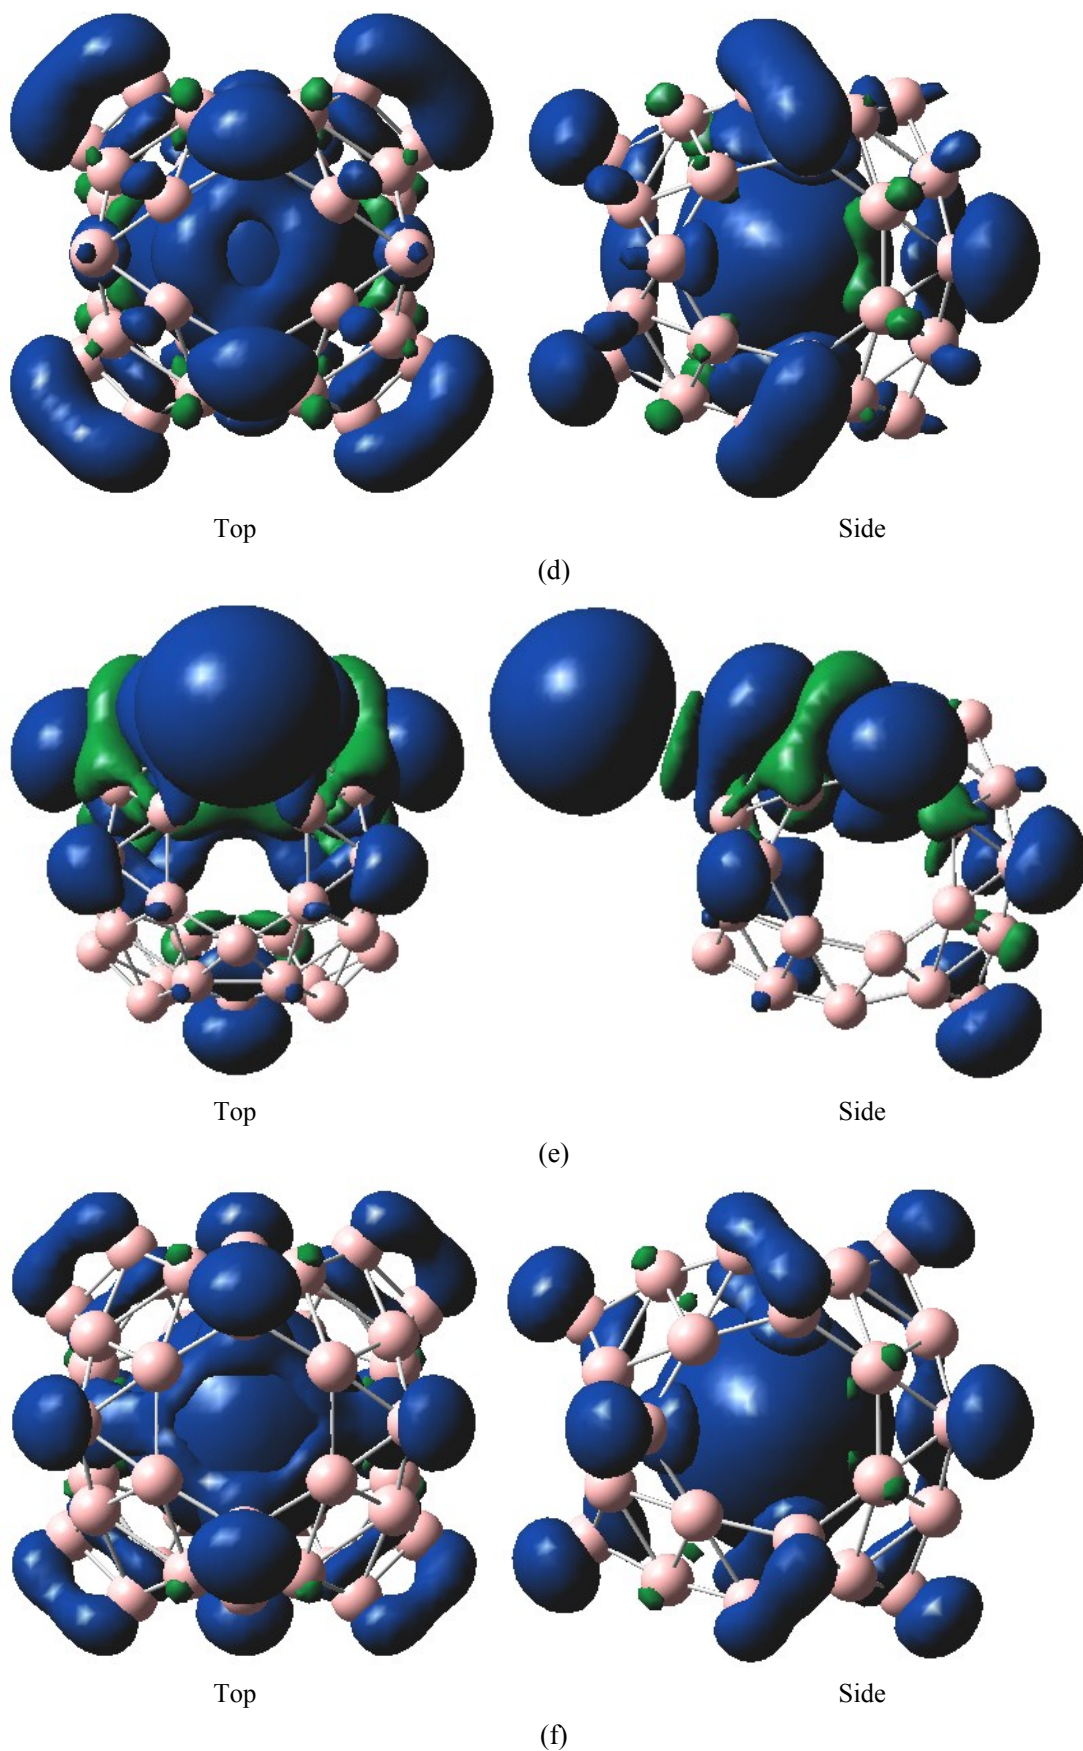

Fig. S4 Spin densities (isosurface value = 0.0004, blue denotes the positive value (up-spin component) and green denotes the negative value (down-spin component)) of



metalloborospherenes MB<sub>40</sub> (M=Cu, Ag, and Au). (a): C<sub>s</sub> Cu&B<sub>40</sub>, (b): C<sub>s</sub> Cu@B<sub>40</sub>, (c): C<sub>s</sub> Ag&B<sub>40</sub>, (d): D<sub>2d</sub> Ag@B<sub>40</sub>, (e): C<sub>s</sub> Au&B<sub>40</sub>, (f): D<sub>2d</sub> Au@B<sub>40</sub>.

Table S1. Calculated VDEs for metalloborospherenes MB<sub>40</sub><sup>-</sup> (M=Cu, Ag, and Au).

| Calculated VDEs(eV) |                                 |                                 |                                 |                                 |                                 |                                 |
|---------------------|---------------------------------|---------------------------------|---------------------------------|---------------------------------|---------------------------------|---------------------------------|
|                     | Cu&B <sub>40</sub> <sup>-</sup> | Cu@B <sub>40</sub> <sup>-</sup> | Ag&B <sub>40</sub> <sup>-</sup> | Ag@B <sub>40</sub> <sup>-</sup> | Au&B <sub>40</sub> <sup>-</sup> | Au@B <sub>40</sub> <sup>-</sup> |
| 1                   | 2.46                            | 2.64                            | 2.98                            | 2.63                            | 3.46                            | 3.60                            |
| 2                   | 3.22                            | 3.49                            | 4.34                            | 3.34                            | 4.45                            | 4.17                            |
| 3                   | 3.25                            | 3.50                            | 4.37                            | 3.34                            | 4.52                            | 4.38                            |
| 4                   | 3.38                            | 3.80                            | 4.39                            | 3.64                            | 4.54                            | 4.52                            |
| 5                   | 3.70                            | 4.00                            | 4.50                            | 3.75                            | 4.63                            | 4.53                            |
| 6                   | 4.03                            | 4.19                            | 4.57                            | 4.15                            | 4.76                            | 4.60                            |
| 7                   | 4.10                            | 4.21                            | 4.60                            | 4.17                            | 4.84                            | 4.64                            |
| 8                   | 4.27                            | 4.32                            | 4.64                            | 4.17                            | 4.99                            | 4.87                            |
| 9                   | 4.37                            | 4.33                            | 4.7                             | 4.21                            | 5.17                            | 4.91                            |
| 10                  | 4.39                            | 4.36                            | 4.75                            | 4.40                            | 5.35                            | 5.23                            |
| 11                  | 4.48                            | 4.48                            | 4.84                            | 4.40                            | 5.44                            | 5.40                            |
| 12                  | 4.51                            | 4.50                            | 4.90                            | 4.40                            | 5.62                            | 5.53                            |
| 13                  | 4.58                            | 4.55                            | 5.50                            | 4.50                            | 5.66                            | 5.56                            |
| 14                  | 4.77                            | 4.56                            | 5.51                            | 4.53                            | 5.75                            | 5.62                            |
| 15                  | 4.82                            | 4.60                            |                                 | 4.6                             |                                 | 5.87                            |
| 16                  | 4.95                            | 4.62                            |                                 | 4.62                            |                                 | 5.88                            |
| 17                  | 4.96                            | 4.69                            |                                 | 4.65                            |                                 | 5.88                            |
| 18                  | 4.98                            | 4.70                            |                                 | 4.71                            |                                 |                                 |
| 19                  | 4.99                            | 4.85                            |                                 | 4.71                            |                                 |                                 |
| 20                  |                                 | 5.05                            |                                 | 4.91                            |                                 |                                 |
| 21                  |                                 | 5.06                            |                                 | 5.15                            |                                 |                                 |
| 22                  |                                 |                                 |                                 | 5.22                            |                                 |                                 |
| 23                  |                                 |                                 |                                 | 5.22                            |                                 |                                 |

Table S2. Predicted normal mode frequencies (cm<sup>-1</sup>) and the infrared and Raman activities for the Cu&B<sub>40</sub>.

| Mode # ▲ | Freq   | Infrared | Raman Activity |
|----------|--------|----------|----------------|
| 1        | 115.83 | 0.1512   | 24.6995        |
| 2        | 165.82 | 1.0189   | 39.6286        |
| 3        | 171.16 | 0.1836   | 9.9920         |
| 4        | 191.08 | 1.0584   | 2.6853         |
| 5        | 191.97 | 0.0237   | 38.4866        |
| 6        | 210.52 | 0.0456   | 19.9808        |
| 7        | 217.43 | 0.0119   | 27.0265        |
| 8        | 230.29 | 0.0011   | 27.9995        |
| 9        | 236.77 | 1.5944   | 23.4927        |
| 10       | 242.51 | 0.1483   | 2.1024         |
| 11       | 246.85 | 0.3780   | 9.5792         |
| 12       | 262.04 | 0.0043   | 8.1472         |
| 13       | 270.91 | 1.4582   | 0.2520         |
| 14       | 292.55 | 1.6631   | 23.1288        |
| 15       | 300.53 | 4.6843   | 4.4389         |
| 16       | 305.99 | 8.8625   | 46.9226        |
| 17       | 324.74 | 5.4717   | 1.8315         |
| 18       | 325.39 | 5.0637   | 10.7723        |
| 19       | 332.90 | 0.3162   | 28.8012        |
| 20       | 334.84 | 11.3221  | 9.9175         |
| 21       | 347.49 | 0.4201   | 15.2012        |
| 22       | 352.75 | 0.6668   | 0.2192         |
| 23       | 360.39 | 0.8231   | 39.0297        |
| 24       | 367.63 | 5.7865   | 15.3074        |
| 25       | 370.94 | 6.0529   | 0.4856         |
| 26       | 374.51 | 10.5582  | 5.1010         |
| 27       | 382.75 | 0.2023   | 6.7621         |
| 28       | 387.82 | 2.4559   | 22.4520        |
| 29       | 394.20 | 1.2327   | 7.2461         |
| 30       | 399.67 | 0.6479   | 6.1340         |
| 31       | 404.89 | 0.8202   | 7.6044         |
| 32       | 407.19 | 3.6839   | 18.3357        |
| 33       | 415.49 | 0.6463   | 1.0634         |
| 34       | 426.66 | 2.6794   | 54.3479        |
| 35       | 426.98 | 11.8919  | 5.9365         |
| 36       | 430.63 | 0.1730   | 36.1713        |
| 37       | 434.76 | 0.4609   | 83.0984        |
| 38       | 444.03 | 9.1486   | 6.7334         |
| 39       | 447.67 | 1.8844   | 5.2038         |
| 40       | 456.02 | 0.7657   | 48.9624        |
| 41       | 465.85 | 2.7600   | 31.7178        |
| 42       | 467.66 | 1.1672   | 2.6003         |
| 43       | 470.88 | 3.0229   | 0.8791         |
| 44       | 476.18 | 0.6827   | 2.3013         |
| 45       | 476.88 | 1.3629   | 5.1463         |
| 46       | 480.22 | 3.1663   | 26.4101        |
| 47       | 488.50 | 0.0660   | 23.0488        |
| 48       | 491.84 | 1.2917   | 4.7560         |
| 49       | 504.77 | 1.9367   | 26.8927        |
| 50       | 505.87 | 1.3510   | 11.4217        |
| 51       | 515.98 | 1.4391   | 17.4645        |
| 52       | 524.80 | 2.0496   | 0.2423         |

|     |         |         |         |
|-----|---------|---------|---------|
| 53  | 562.87  | 4.1705  | 48.8438 |
| 54  | 576.47  | 4.6702  | 23.1293 |
| 55  | 578.15  | 1.9989  | 2.4559  |
| 56  | 583.21  | 0.0444  | 3.5213  |
| 57  | 603.04  | 1.8045  | 3.0543  |
| 58  | 609.42  | 17.1477 | 8.0684  |
| 59  | 613.15  | 3.0324  | 5.4679  |
| 60  | 619.95  | 2.8859  | 11.3263 |
| 61  | 626.99  | 0.0112  | 4.0138  |
| 62  | 644.86  | 0.6981  | 22.3171 |
| 63  | 648.39  | 0.0603  | 0.1913  |
| 64  | 649.90  | 0.4968  | 28.9570 |
| 65  | 658.57  | 4.9490  | 33.5554 |
| 66  | 658.96  | 3.8986  | 4.7196  |
| 67  | 679.45  | 2.4321  | 34.0683 |
| 68  | 683.49  | 0.1146  | 11.7472 |
| 69  | 684.82  | 1.2813  | 57.3869 |
| 70  | 695.27  | 2.9780  | 6.6248  |
| 71  | 698.93  | 3.9765  | 62.5126 |
| 72  | 707.20  | 0.7956  | 27.1014 |
| 73  | 722.77  | 1.7963  | 46.4262 |
| 74  | 748.37  | 10.9543 | 19.1270 |
| 75  | 753.11  | 0.3507  | 14.0658 |
| 76  | 760.01  | 24.6739 | 17.5479 |
| 77  | 761.90  | 1.4256  | 5.1579  |
| 78  | 772.86  | 16.7889 | 33.6706 |
| 79  | 779.81  | 6.4007  | 5.3675  |
| 80  | 802.15  | 0.3768  | 59.9769 |
| 81  | 805.00  | 0.0184  | 35.8318 |
| 82  | 818.00  | 1.9029  | 5.7969  |
| 83  | 825.21  | 10.8376 | 19.1046 |
| 84  | 840.02  | 16.0753 | 7.0993  |
| 85  | 849.64  | 0.0033  | 11.6573 |
| 86  | 853.80  | 2.5534  | 13.3892 |
| 87  | 861.00  | 1.1607  | 4.8640  |
| 88  | 882.11  | 0.3202  | 10.3383 |
| 89  | 892.62  | 2.4008  | 1.6981  |
| 90  | 908.46  | 2.0187  | 24.2793 |
| 91  | 963.92  | 8.9560  | 14.0171 |
| 92  | 989.44  | 9.0937  | 3.1791  |
| 93  | 1006.02 | 2.9714  | 19.8767 |
| 94  | 1015.98 | 0.0796  | 8.4262  |
| 95  | 1031.52 | 10.6079 | 47.6044 |
| 96  | 1043.66 | 11.7889 | 22.8586 |
| 97  | 1064.13 | 3.7219  | 26.1718 |
| 98  | 1093.49 | 18.9301 | 75.2000 |
| 99  | 1110.10 | 44.6790 | 22.0300 |
| 100 | 1141.17 | 11.3657 | 26.5922 |
| 101 | 1143.70 | 23.4744 | 89.2198 |
| 102 | 1154.93 | 17.5910 | 22.8470 |
| 103 | 1162.06 | 11.2456 | 2.3534  |
| 104 | 1180.44 | 17.3032 | 8.4698  |
| 105 | 1186.73 | 2.5850  | 35.9426 |
| 106 | 1197.66 | 5.9251  | 16.2046 |
| 107 | 1212.30 | 9.8652  | 36.8489 |
| 108 | 1221.14 | 13.6244 | 10.5316 |

|     |         |          |          |
|-----|---------|----------|----------|
| 109 | 1236.17 | 59.2620  | 54.7092  |
| 110 | 1245.96 | 106.0125 | 13.3200  |
| 111 | 1258.17 | 57.8787  | 30.4521  |
| 112 | 1259.21 | 5.4342   | 37.4258  |
| 113 | 1274.88 | 179.1668 | 133.0119 |
| 114 | 1278.22 | 81.6575  | 8.4668   |
| 115 | 1288.77 | 63.1945  | 5.4131   |
| 116 | 1307.84 | 2.2069   | 47.0460  |
| 117 | 1322.55 | 6.3636   | 75.4149  |

Table S3. Predicted normal mode frequencies (cm<sup>-1</sup>) and the infrared and Raman activities for the Cu&B<sub>40</sub><sup>-</sup>.

| Mode # ▲ | Freq   | Infrared | Raman Activity |
|----------|--------|----------|----------------|
| 1        | 106.88 | 2.8633   | 23.2417        |
| 2        | 144.50 | 9.1581   | 162.5346       |
| 3        | 158.44 | 7.1790   | 12.1447        |
| 4        | 168.76 | 1.3529   | 17.1003        |
| 5        | 184.70 | 0.4509   | 44.9824        |
| 6        | 201.06 | 0.0133   | 5.1357         |
| 7        | 206.54 | 0.1141   | 21.3709        |
| 8        | 220.43 | 0.2901   | 37.5763        |
| 9        | 230.52 | 2.9731   | 25.0310        |
| 10       | 237.85 | 3.1704   | 1.4628         |
| 11       | 243.22 | 0.0170   | 10.5476        |
| 12       | 249.95 | 1.5881   | 10.7331        |
| 13       | 261.72 | 2.7330   | 10.7953        |
| 14       | 282.78 | 2.9793   | 22.1983        |
| 15       | 292.80 | 6.9862   | 58.6084        |
| 16       | 299.79 | 12.4779  | 11.3385        |
| 17       | 313.32 | 7.7655   | 81.7442        |
| 18       | 318.32 | 22.9496  | 0.6929         |
| 19       | 323.49 | 10.7313  | 147.2726       |
| 20       | 323.52 | 1.2797   | 33.8754        |
| 21       | 329.57 | 11.6478  | 35.0739        |
| 22       | 342.49 | 0.0167   | 22.3363        |
| 23       | 344.44 | 1.0457   | 4.5343         |
| 24       | 348.70 | 5.5393   | 49.5967        |
| 25       | 360.74 | 15.8300  | 21.5517        |
| 26       | 367.63 | 2.7882   | 5.5932         |
| 27       | 377.12 | 0.0274   | 8.7971         |
| 28       | 378.32 | 6.4892   | 42.0730        |
| 29       | 384.46 | 1.7606   | 10.3154        |
| 30       | 389.22 | 0.0660   | 29.3674        |
| 31       | 400.19 | 3.2458   | 21.6732        |
| 32       | 406.41 | 0.4058   | 6.5719         |
| 33       | 406.95 | 0.0058   | 13.9049        |
| 34       | 425.13 | 12.3839  | 15.3463        |
| 35       | 427.54 | 0.2486   | 23.5221        |
| 36       | 428.64 | 8.7964   | 10.0903        |
| 37       | 433.37 | 0.6899   | 176.0588       |
| 38       | 440.54 | 21.8469  | 2.0877         |
| 39       | 448.92 | 3.0076   | 14.4966        |
| 40       | 456.38 | 0.5956   | 70.5120        |
| 41       | 464.65 | 5.2090   | 0.0995         |
| 42       | 466.01 | 1.5420   | 86.9025        |
| 43       | 470.45 | 0.1961   | 4.3809         |
| 44       | 477.37 | 0.8500   | 9.8360         |
| 45       | 477.40 | 16.0807  | 28.5708        |
| 46       | 477.55 | 1.3636   | 3.1692         |
| 47       | 486.24 | 0.8257   | 25.3721        |
| 48       | 488.88 | 3.6061   | 93.4083        |
| 49       | 498.47 | 6.4222   | 56.5839        |
| 50       | 504.05 | 2.4529   | 2.9449         |
| 51       | 515.82 | 1.4606   | 6.3133         |
| 52       | 529.49 | 4.1256   | 2.9325         |

|     |         |         |          |
|-----|---------|---------|----------|
| 53  | 560.75  | 6.1617  | 64.8661  |
| 54  | 573.07  | 2.2164  | 10.7746  |
| 55  | 577.54  | 0.0979  | 2.6753   |
| 56  | 577.80  | 7.3763  | 39.3764  |
| 57  | 594.41  | 3.4829  | 2.2171   |
| 58  | 601.37  | 29.8709 | 6.4401   |
| 59  | 610.83  | 4.2089  | 1.9786   |
| 60  | 613.99  | 17.1370 | 41.4439  |
| 61  | 628.95  | 1.8493  | 6.4402   |
| 62  | 632.38  | 3.9509  | 95.2378  |
| 63  | 648.51  | 3.2250  | 4.4930   |
| 64  | 650.79  | 0.3365  | 6.7017   |
| 65  | 654.64  | 17.5531 | 38.1700  |
| 66  | 659.18  | 1.3054  | 5.2709   |
| 67  | 674.03  | 4.4560  | 135.2448 |
| 68  | 679.47  | 3.6997  | 119.2749 |
| 69  | 681.71  | 4.6942  | 29.9357  |
| 70  | 690.44  | 3.2974  | 11.2915  |
| 71  | 695.36  | 0.0083  | 44.7760  |
| 72  | 702.62  | 1.0730  | 31.3948  |
| 73  | 730.45  | 24.4355 | 80.2050  |
| 74  | 744.29  | 1.6505  | 12.2383  |
| 75  | 744.34  | 24.5427 | 56.1110  |
| 76  | 746.53  | 70.6709 | 29.3312  |
| 77  | 756.98  | 0.2283  | 7.2583   |
| 78  | 771.53  | 9.7797  | 2.5055   |
| 79  | 777.80  | 0.4566  | 145.2352 |
| 80  | 796.84  | 1.1616  | 56.5153  |
| 81  | 798.71  | 6.6277  | 60.3621  |
| 82  | 810.52  | 0.7045  | 12.8941  |
| 83  | 818.10  | 15.6382 | 30.0509  |
| 84  | 832.60  | 13.7820 | 32.1217  |
| 85  | 837.20  | 0.1439  | 31.5710  |
| 86  | 844.13  | 6.5395  | 10.7156  |
| 87  | 857.13  | 1.8749  | 6.6547   |
| 88  | 872.78  | 3.4242  | 11.8969  |
| 89  | 875.76  | 0.1518  | 38.2626  |
| 90  | 900.81  | 3.9841  | 24.3708  |
| 91  | 944.46  | 17.9603 | 57.5370  |
| 92  | 979.67  | 3.1468  | 6.3989   |
| 93  | 990.83  | 29.7618 | 53.5422  |
| 94  | 1010.33 | 0.0474  | 35.7303  |
| 95  | 1018.02 | 14.4288 | 30.9585  |
| 96  | 1039.25 | 13.7766 | 89.4487  |
| 97  | 1058.68 | 1.6734  | 19.2697  |
| 98  | 1078.25 | 18.7777 | 59.0800  |
| 99  | 1104.79 | 66.9908 | 73.3937  |
| 100 | 1126.96 | 25.9215 | 105.1861 |
| 101 | 1127.49 | 15.5946 | 61.1432  |
| 102 | 1144.80 | 1.4687  | 153.5350 |
| 103 | 1154.93 | 3.6079  | 1.0040   |
| 104 | 1172.68 | 30.4052 | 5.6542   |
| 105 | 1177.60 | 10.2786 | 72.0225  |
| 106 | 1187.68 | 3.8313  | 152.7389 |
| 107 | 1204.78 | 18.9119 | 155.1752 |
| 108 | 1210.07 | 38.8676 | 19.4404  |

|     |         |          |          |
|-----|---------|----------|----------|
| 109 | 1227.38 | 44.4147  | 7.5853   |
| 110 | 1236.14 | 132.2307 | 26.3791  |
| 111 | 1248.13 | 0.1262   | 40.8837  |
| 112 | 1255.68 | 72.9524  | 181.2961 |
| 113 | 1264.64 | 118.0428 | 851.6674 |
| 114 | 1270.86 | 79.3587  | 21.1177  |
| 115 | 1280.64 | 75.6365  | 107.5232 |
| 116 | 1304.57 | 3.1776   | 82.5482  |
| 117 | 1318.92 | 10.7727  | 71.2787  |

Table S4. Predicted normal mode frequencies (cm<sup>-1</sup>) and the infrared and Raman activities for the Cu@B<sub>40</sub>.

| Mode # ▲ | Freq   | Infrared | Raman Activity |
|----------|--------|----------|----------------|
| 1        | 88.52  | 1.5897   | 0.7142         |
| 2        | 96.92  | 0.0449   | 0.8334         |
| 3        | 107.88 | 2.5499   | 3.1287         |
| 4        | 165.75 | 2.0806   | 28.4817        |
| 5        | 175.95 | 0.1603   | 76.1536        |
| 6        | 198.30 | 2.4834   | 4.7782         |
| 7        | 207.12 | 0.0634   | 0.6167         |
| 8        | 219.60 | 1.0953   | 32.3059        |
| 9        | 221.26 | 0.1731   | 16.6653        |
| 10       | 234.56 | 0.8391   | 17.4995        |
| 11       | 237.24 | 0.3662   | 18.0605        |
| 12       | 252.42 | 0.5118   | 25.1413        |
| 13       | 270.68 | 2.0508   | 17.0056        |
| 14       | 271.46 | 12.7923  | 18.6244        |
| 15       | 279.75 | 3.1952   | 9.5504         |
| 16       | 302.42 | 8.8227   | 26.2676        |
| 17       | 320.20 | 2.8714   | 16.3101        |
| 18       | 329.81 | 0.0746   | 40.7032        |
| 19       | 335.29 | 3.8037   | 0.7126         |
| 20       | 342.56 | 0.8274   | 10.0114        |
| 21       | 347.72 | 0.7126   | 2.6626         |
| 22       | 347.83 | 0.0002   | 1.4932         |
| 23       | 354.47 | 4.8167   | 30.3767        |
| 24       | 367.47 | 4.3714   | 3.7318         |
| 25       | 377.23 | 4.3543   | 14.7888        |
| 26       | 377.55 | 1.8120   | 2.1521         |
| 27       | 391.40 | 7.8164   | 2.4935         |
| 28       | 393.56 | 6.2518   | 28.1879        |
| 29       | 398.22 | 2.1652   | 32.4073        |
| 30       | 399.71 | 2.6940   | 2.7415         |
| 31       | 406.02 | 0.2124   | 23.6707        |
| 32       | 408.53 | 0.5430   | 10.3736        |
| 33       | 416.09 | 15.4148  | 21.3380        |
| 34       | 422.54 | 5.3479   | 22.2713        |
| 35       | 425.89 | 0.7439   | 8.9147         |
| 36       | 433.29 | 0.1878   | 40.2088        |
| 37       | 440.17 | 0.3404   | 10.1880        |
| 38       | 444.32 | 2.6246   | 11.6952        |
| 39       | 445.50 | 0.4928   | 66.4840        |
| 40       | 451.19 | 0.9866   | 3.9932         |
| 41       | 457.79 | 0.3279   | 60.0537        |
| 42       | 465.63 | 5.4201   | 80.4987        |
| 43       | 466.63 | 1.8724   | 13.2965        |
| 44       | 466.84 | 3.8699   | 6.5846         |
| 45       | 469.54 | 0.0618   | 2.2246         |
| 46       | 477.17 | 0.3731   | 23.0297        |
| 47       | 479.32 | 0.9552   | 14.7479        |
| 48       | 479.68 | 2.0569   | 7.4660         |
| 49       | 500.16 | 1.8452   | 1.0234         |
| 50       | 505.08 | 2.1967   | 1.7200         |
| 51       | 507.08 | 0.9131   | 35.3566        |
| 52       | 522.19 | 1.0525   | 7.5932         |



|     |         |         |          |
|-----|---------|---------|----------|
| 53  | 560.87  | 6.4232  | 36.6271  |
| 54  | 569.46  | 0.0054  | 0.2234   |
| 55  | 575.51  | 0.2322  | 1.9392   |
| 56  | 575.86  | 2.8189  | 4.8242   |
| 57  | 596.42  | 0.0199  | 4.0429   |
| 58  | 609.88  | 3.9957  | 17.8688  |
| 59  | 612.35  | 0.0054  | 4.5638   |
| 60  | 617.80  | 7.8118  | 6.5134   |
| 61  | 619.63  | 0.1959  | 7.9434   |
| 62  | 624.01  | 0.3969  | 9.9983   |
| 63  | 638.18  | 3.4947  | 42.9789  |
| 64  | 643.52  | 2.1319  | 31.7349  |
| 65  | 653.10  | 1.2807  | 4.3139   |
| 66  | 657.79  | 0.0207  | 4.8855   |
| 67  | 658.43  | 2.9500  | 200.0603 |
| 68  | 674.54  | 5.4362  | 56.5874  |
| 69  | 683.68  | 1.3203  | 86.9187  |
| 70  | 696.04  | 2.6485  | 4.4955   |
| 71  | 696.65  | 0.0806  | 43.8118  |
| 72  | 705.07  | 0.4690  | 20.8732  |
| 73  | 708.23  | 1.6371  | 20.4839  |
| 74  | 725.43  | 0.0625  | 3.0780   |
| 75  | 730.30  | 2.3908  | 1.3941   |
| 76  | 748.36  | 1.7587  | 7.6204   |
| 77  | 753.77  | 3.3605  | 52.6486  |
| 78  | 757.23  | 2.1087  | 0.6033   |
| 79  | 766.67  | 18.6251 | 34.1835  |
| 80  | 793.48  | 24.7239 | 8.6643   |
| 81  | 798.41  | 6.1036  | 14.7679  |
| 82  | 804.40  | 0.1172  | 27.2477  |
| 83  | 813.27  | 1.9409  | 19.8382  |
| 84  | 817.07  | 0.9246  | 93.9244  |
| 85  | 821.63  | 0.4341  | 24.8167  |
| 86  | 825.00  | 4.6049  | 27.4063  |
| 87  | 854.09  | 0.1986  | 5.8220   |
| 88  | 867.10  | 0.0873  | 4.4855   |
| 89  | 886.53  | 0.1139  | 0.6290   |
| 90  | 901.30  | 0.0146  | 10.5572  |
| 91  | 961.91  | 8.3114  | 5.5964   |
| 92  | 982.12  | 7.1459  | 2.4967   |
| 93  | 1009.70 | 1.1194  | 21.6814  |
| 94  | 1021.22 | 0.1441  | 6.6729   |
| 95  | 1021.90 | 3.5278  | 69.5279  |
| 96  | 1047.72 | 0.1320  | 0.0693   |
| 97  | 1064.36 | 3.6035  | 113.0394 |
| 98  | 1101.76 | 19.1486 | 118.1120 |
| 99  | 1105.04 | 3.9251  | 39.7693  |
| 100 | 1135.49 | 0.8261  | 71.6760  |
| 101 | 1154.68 | 36.5829 | 5.3232   |
| 102 | 1160.04 | 10.7762 | 5.6905   |
| 103 | 1168.30 | 0.1218  | 65.7432  |
| 104 | 1176.50 | 2.8830  | 37.6497  |
| 105 | 1188.94 | 17.1913 | 119.7527 |
| 106 | 1197.81 | 2.9271  | 7.1550   |
| 107 | 1201.40 | 24.1107 | 13.2323  |
| 108 | 1210.24 | 13.7486 | 130.4741 |

|     |         |         |          |
|-----|---------|---------|----------|
| 109 | 1237.80 | 72.8074 | 283.8518 |
| 110 | 1239.15 | 12.8695 | 2.5743   |
| 111 | 1240.53 | 21.9966 | 58.2304  |
| 112 | 1243.73 | 11.1108 | 33.2080  |
| 113 | 1248.62 | 43.4920 | 18.3362  |
| 114 | 1264.94 | 87.3148 | 26.0929  |
| 115 | 1271.99 | 82.3639 | 12.7965  |
| 116 | 1299.35 | 19.7949 | 106.0157 |
| 117 | 1314.30 | 14.5360 | 149.4519 |

Table S5. Predicted normal mode frequencies (cm<sup>-1</sup>) and the infrared and Raman activities for the Cu@B<sub>40</sub><sup>-</sup>.

| Mode # | Freq   | Infrared | Raman Activity |
|--------|--------|----------|----------------|
| 1      | 92.43  | 0.2143   | 2.5255         |
| 2      | 104.38 | 1.2274   | 2.3120         |
| 3      | 121.96 | 2.9714   | 13.1572        |
| 4      | 170.84 | 0.8772   | 72.3803        |
| 5      | 180.52 | 1.5809   | 55.7836        |
| 6      | 206.17 | 5.4174   | 9.1721         |
| 7      | 208.19 | 0.0007   | 6.5882         |
| 8      | 213.60 | 0.3252   | 2.1228         |
| 9      | 217.71 | 2.4201   | 19.2253        |
| 10     | 223.06 | 0.1107   | 16.6499        |
| 11     | 237.44 | 1.2134   | 19.7899        |
| 12     | 237.60 | 0.0297   | 12.9367        |
| 13     | 257.60 | 23.5810  | 4.9768         |
| 14     | 261.46 | 1.6479   | 68.7034        |
| 15     | 273.42 | 5.9880   | 27.1491        |
| 16     | 287.25 | 3.4335   | 5.9580         |
| 17     | 317.33 | 3.4190   | 1.1698         |
| 18     | 319.49 | 6.4950   | 0.6897         |
| 19     | 321.38 | 3.8610   | 44.8815        |
| 20     | 331.44 | 1.9596   | 7.2742         |
| 21     | 332.07 | 0.2151   | 7.8969         |
| 22     | 338.92 | 4.4410   | 3.4712         |
| 23     | 344.04 | 4.0759   | 12.5411        |
| 24     | 363.73 | 0.0222   | 8.0628         |
| 25     | 371.80 | 0.0296   | 0.6731         |
| 26     | 377.99 | 0.4782   | 32.0347        |
| 27     | 391.36 | 11.7617  | 29.2031        |
| 28     | 393.69 | 6.3193   | 12.0313        |
| 29     | 397.31 | 3.7805   | 10.7330        |
| 30     | 401.14 | 19.3243  | 6.0063         |
| 31     | 406.53 | 0.0099   | 2.9471         |
| 32     | 410.70 | 11.4985  | 17.0062        |
| 33     | 413.24 | 0.9322   | 30.5291        |
| 34     | 416.73 | 12.6510  | 13.3179        |
| 35     | 422.31 | 2.6920   | 34.3510        |
| 36     | 435.16 | 0.1055   | 1.6156         |
| 37     | 439.63 | 0.0828   | 82.3635        |
| 38     | 440.40 | 0.0192   | 13.0375        |
| 39     | 444.46 | 5.3509   | 59.2196        |
| 40     | 453.49 | 5.7225   | 27.8893        |
| 41     | 455.49 | 0.0955   | 47.2425        |
| 42     | 455.74 | 10.5826  | 20.1827        |
| 43     | 461.38 | 6.9479   | 81.1026        |
| 44     | 474.91 | 3.1999   | 18.1588        |
| 45     | 475.03 | 4.9187   | 5.5503         |
| 46     | 476.48 | 4.4966   | 16.6505        |
| 47     | 479.22 | 0.7764   | 8.3996         |
| 48     | 481.70 | 1.9705   | 5.7225         |
| 49     | 504.07 | 2.0683   | 2.8179         |
| 50     | 504.85 | 2.2664   | 0.7319         |
| 51     | 508.40 | 1.6989   | 2.4372         |
| 52     | 524.36 | 3.4142   | 11.8185        |

|     |         |         |          |
|-----|---------|---------|----------|
| 53  | 563.97  | 0.1341  | 0.7006   |
| 54  | 567.94  | 10.2571 | 17.7387  |
| 55  | 573.09  | 0.2565  | 1.6453   |
| 56  | 581.35  | 4.7791  | 3.4133   |
| 57  | 588.71  | 0.0494  | 1.0567   |
| 58  | 603.98  | 0.1482  | 39.6950  |
| 59  | 606.58  | 0.2992  | 3.4321   |
| 60  | 614.65  | 1.1343  | 0.1447   |
| 61  | 620.73  | 33.9249 | 30.2650  |
| 62  | 627.93  | 1.2618  | 23.1121  |
| 63  | 627.94  | 1.1954  | 25.1420  |
| 64  | 643.75  | 1.3500  | 101.2893 |
| 65  | 652.51  | 16.4657 | 26.2905  |
| 66  | 653.59  | 16.3096 | 114.4552 |
| 67  | 657.94  | 8.2296  | 15.7472  |
| 68  | 663.17  | 0.3627  | 14.7659  |
| 69  | 681.66  | 1.2870  | 19.2330  |
| 70  | 688.40  | 0.0454  | 63.8777  |
| 71  | 697.45  | 0.8458  | 6.3783   |
| 72  | 708.04  | 26.7384 | 9.9416   |
| 73  | 712.50  | 2.4968  | 30.7667  |
| 74  | 720.65  | 3.9697  | 27.8872  |
| 75  | 723.81  | 2.4479  | 21.4483  |
| 76  | 729.88  | 8.1418  | 12.1662  |
| 77  | 740.73  | 0.5112  | 5.4635   |
| 78  | 758.50  | 8.0059  | 44.9367  |
| 79  | 765.21  | 10.6788 | 46.3598  |
| 80  | 785.89  | 5.9969  | 29.0347  |
| 81  | 787.93  | 33.3307 | 3.9590   |
| 82  | 796.46  | 0.0149  | 6.6166   |
| 83  | 802.58  | 1.9710  | 93.3696  |
| 84  | 803.83  | 2.9862  | 14.9362  |
| 85  | 811.81  | 0.0426  | 49.1990  |
| 86  | 814.69  | 4.8942  | 62.6692  |
| 87  | 848.35  | 0.0016  | 7.5516   |
| 88  | 856.71  | 0.6071  | 0.4010   |
| 89  | 870.44  | 0.6004  | 3.2306   |
| 90  | 887.37  | 0.0195  | 14.3241  |
| 91  | 950.28  | 12.1848 | 10.1531  |
| 92  | 970.22  | 7.3378  | 1.0410   |
| 93  | 1002.75 | 0.4675  | 32.3008  |
| 94  | 1012.65 | 1.0800  | 127.4812 |
| 95  | 1017.81 | 0.8537  | 3.4431   |
| 96  | 1046.89 | 1.8001  | 0.0491   |
| 97  | 1056.36 | 7.3346  | 59.7012  |
| 98  | 1092.58 | 33.8054 | 60.9631  |
| 99  | 1100.51 | 5.0784  | 49.8961  |
| 100 | 1124.24 | 9.5620  | 141.3763 |
| 101 | 1145.43 | 39.3831 | 7.5543   |
| 102 | 1153.77 | 4.0167  | 25.2335  |
| 103 | 1157.94 | 3.0311  | 53.2251  |
| 104 | 1167.80 | 8.1154  | 99.4099  |
| 105 | 1180.52 | 34.5066 | 108.7864 |
| 106 | 1190.90 | 0.6193  | 7.2447   |
| 107 | 1191.72 | 8.9059  | 89.1384  |
| 108 | 1194.32 | 51.6773 | 15.6348  |

|     |         |         |          |
|-----|---------|---------|----------|
| 109 | 1214.31 | 37.3282 | 82.2693  |
| 110 | 1225.30 | 5.0030  | 129.2525 |
| 111 | 1229.08 | 3.2495  | 13.0426  |
| 112 | 1231.76 | 1.7056  | 3.9855   |
| 113 | 1240.33 | 54.8637 | 31.9596  |
| 114 | 1258.07 | 83.9149 | 17.4940  |
| 115 | 1266.43 | 88.5501 | 56.1362  |
| 116 | 1291.14 | 40.1258 | 82.1875  |
| 117 | 1304.76 | 31.0172 | 45.2234  |

Table S6. Predicted normal mode frequencies (cm<sup>-1</sup>) and the infrared and Raman activities for the Ag&B<sub>40</sub>.

| Mode # ▲ | Freq   | Infrared | Raman Activity |
|----------|--------|----------|----------------|
| 1        | 25.49  | 0.5761   | 6.0462         |
| 2        | 25.82  | 0.4338   | 7.2445         |
| 3        | 106.46 | 0.2963   | 27.0363        |
| 4        | 174.54 | 0.1064   | 38.4699        |
| 5        | 187.12 | 0.8127   | 54.0757        |
| 6        | 199.22 | 0.0690   | 3.1325         |
| 7        | 213.90 | 0.5713   | 13.4581        |
| 8        | 216.49 | 0.1002   | 16.1250        |
| 9        | 221.18 | 0.1218   | 24.4093        |
| 10       | 239.05 | 0.1081   | 21.7356        |
| 11       | 244.10 | 0.0133   | 0.3048         |
| 12       | 247.39 | 1.9045   | 30.9157        |
| 13       | 274.04 | 0.0043   | 9.9137         |
| 14       | 275.88 | 1.3889   | 8.4379         |
| 15       | 303.47 | 0.0072   | 0.0349         |
| 16       | 322.52 | 1.0110   | 3.3667         |
| 17       | 325.90 | 3.1337   | 19.4133        |
| 18       | 342.53 | 1.6101   | 53.3604        |
| 19       | 342.97 | 0.2087   | 0.6385         |
| 20       | 350.45 | 0.0924   | 58.6206        |
| 21       | 356.62 | 0.7421   | 0.1266         |
| 22       | 357.64 | 0.8522   | 19.4352        |
| 23       | 363.07 | 2.0726   | 13.8655        |
| 24       | 371.44 | 4.7001   | 9.6445         |
| 25       | 382.48 | 31.4198  | 16.5042        |
| 26       | 385.20 | 8.9742   | 2.0598         |
| 27       | 389.79 | 10.5653  | 1.9378         |
| 28       | 393.90 | 6.2337   | 42.9203        |
| 29       | 395.08 | 6.7601   | 1.1971         |
| 30       | 400.44 | 3.5038   | 33.0828        |
| 31       | 409.54 | 0.3771   | 6.0272         |
| 32       | 410.97 | 0.0793   | 7.6648         |
| 33       | 415.73 | 0.9587   | 60.3019        |
| 34       | 423.36 | 0.5143   | 6.7349         |
| 35       | 426.64 | 2.4425   | 41.8723        |
| 36       | 431.32 | 0.5538   | 91.6020        |
| 37       | 435.18 | 4.7745   | 31.8394        |
| 38       | 437.30 | 0.7972   | 4.6610         |
| 39       | 451.57 | 0.2553   | 4.3639         |
| 40       | 460.24 | 0.2187   | 47.4842        |
| 41       | 464.12 | 0.0021   | 1.4819         |
| 42       | 472.03 | 0.7177   | 1.3148         |
| 43       | 474.59 | 4.6855   | 1.0185         |
| 44       | 476.63 | 0.4241   | 16.1456        |
| 45       | 477.49 | 0.7250   | 8.4153         |
| 46       | 484.51 | 0.3969   | 3.1436         |
| 47       | 491.25 | 0.1009   | 21.4941        |
| 48       | 500.26 | 1.3404   | 6.6123         |
| 49       | 502.59 | 3.6410   | 0.8522         |
| 50       | 503.67 | 0.9787   | 57.6485        |
| 51       | 510.03 | 0.4182   | 6.3246         |
| 52       | 536.94 | 21.8288  | 161.2094       |

|     |         |         |          |
|-----|---------|---------|----------|
| 53  | 585.74  | 4.8978  | 7.2888   |
| 54  | 576.38  | 0.1212  | 0.5734   |
| 55  | 583.91  | 4.3700  | 6.4442   |
| 56  | 585.82  | 1.2569  | 6.1665   |
| 57  | 608.66  | 0.2694  | 0.1760   |
| 58  | 618.90  | 13.0076 | 9.5950   |
| 59  | 619.06  | 0.0652  | 1.6671   |
| 60  | 625.98  | 0.0007  | 5.2097   |
| 61  | 626.81  | 1.8636  | 134.0938 |
| 62  | 629.58  | 0.1667  | 1.6494   |
| 63  | 643.45  | 5.2073  | 86.9810  |
| 64  | 659.72  | 0.0867  | 0.0970   |
| 65  | 660.40  | 0.2773  | 64.2737  |
| 66  | 663.33  | 0.6128  | 9.1040   |
| 67  | 685.42  | 19.8417 | 764.6392 |
| 68  | 690.38  | 0.0874  | 10.4160  |
| 69  | 691.14  | 1.4288  | 159.1700 |
| 70  | 704.04  | 6.9301  | 122.4695 |
| 71  | 707.79  | 0.9236  | 0.5482   |
| 72  | 708.13  | 1.9413  | 31.7960  |
| 73  | 720.47  | 26.1507 | 475.2668 |
| 74  | 754.22  | 5.5159  | 35.0612  |
| 75  | 759.49  | 3.0831  | 0.3113   |
| 76  | 764.60  | 2.4234  | 37.2374  |
| 77  | 765.44  | 1.8955  | 13.2768  |
| 78  | 779.67  | 0.0119  | 12.7615  |
| 79  | 790.28  | 21.7028 | 48.0719  |
| 80  | 804.58  | 2.8429  | 16.4014  |
| 81  | 804.72  | 2.4187  | 6.1709   |
| 82  | 818.97  | 20.7353 | 26.6475  |
| 83  | 838.27  | 0.5660  | 2.8775   |
| 84  | 840.34  | 7.6326  | 61.9296  |
| 85  | 850.17  | 2.8434  | 3.7766   |
| 86  | 852.97  | 1.2478  | 26.3593  |
| 87  | 857.93  | 0.0423  | 7.1416   |
| 88  | 876.91  | 0.1426  | 15.7396  |
| 89  | 907.25  | 0.1116  | 3.6828   |
| 90  | 916.67  | 0.0010  | 7.2557   |
| 91  | 982.53  | 6.1869  | 0.7950   |
| 92  | 992.73  | 9.6635  | 0.0633   |
| 93  | 1021.03 | 0.0923  | 14.0836  |
| 94  | 1037.64 | 7.1484  | 0.2772   |
| 95  | 1038.55 | 9.6132  | 30.8047  |
| 96  | 1051.62 | 1.2171  | 1.0730   |
| 97  | 1100.85 | 21.2154 | 18.2598  |
| 98  | 1130.64 | 24.9267 | 127.4159 |
| 99  | 1140.29 | 20.4333 | 10.8389  |
| 100 | 1147.83 | 7.2292  | 30.4686  |
| 101 | 1162.32 | 0.1496  | 2.1793   |
| 102 | 1186.08 | 2.7658  | 77.5957  |
| 103 | 1192.91 | 7.6500  | 87.8419  |
| 104 | 1199.80 | 10.7897 | 34.2806  |
| 105 | 1205.32 | 9.7499  | 6.4128   |
| 106 | 1223.60 | 7.3895  | 57.9643  |
| 107 | 1235.38 | 4.0840  | 54.4405  |
| 108 | 1244.10 | 15.6083 | 53.1063  |

|     |         |          |          |
|-----|---------|----------|----------|
| 109 | 1250.28 | 1.5877   | 51.5111  |
| 110 | 1256.77 | 79.3883  | 7.9356   |
| 111 | 1256.90 | 76.1452  | 36.2504  |
| 112 | 1270.38 | 191.5377 | 37.5988  |
| 113 | 1275.54 | 5.4380   | 9.9259   |
| 114 | 1289.27 | 35.4262  | 36.2274  |
| 115 | 1289.81 | 101.5530 | 12.9205  |
| 116 | 1308.51 | 26.0078  | 76.9440  |
| 117 | 1319.64 | 15.3725  | 157.0902 |



Table S7. Predicted normal mode frequencies (cm<sup>-1</sup>) and the infrared and Raman activities for the Ag&B<sub>40</sub><sup>-</sup>.

| Mode # ▲ | Freq   | Infrared | Raman Activity |
|----------|--------|----------|----------------|
| 1        | 35.84  | 0.5487   | 9.1844         |
| 2        | 40.88  | 0.8931   | 10.3240        |
| 3        | 111.36 | 0.0403   | 24.2316        |
| 4        | 170.96 | 1.6686   | 82.2249        |
| 5        | 183.58 | 1.0597   | 65.6118        |
| 6        | 202.79 | 0.0715   | 5.6053         |
| 7        | 213.17 | 2.3703   | 20.0822        |
| 8        | 217.21 | 0.1844   | 14.4371        |
| 9        | 222.91 | 0.1500   | 31.5640        |
| 10       | 231.86 | 0.1686   | 22.3086        |
| 11       | 237.79 | 1.9874   | 29.6757        |
| 12       | 244.27 | 0.0197   | 3.4612         |
| 13       | 267.43 | 0.0474   | 13.8474        |
| 14       | 270.98 | 2.7348   | 11.9444        |
| 15       | 293.80 | 0.5979   | 0.5477         |
| 16       | 311.01 | 0.4966   | 11.5914        |
| 17       | 325.12 | 9.6146   | 85.4031        |
| 18       | 339.26 | 0.1397   | 0.6064         |
| 19       | 343.30 | 6.2926   | 23.2000        |
| 20       | 345.89 | 1.2036   | 6.5226         |
| 21       | 346.15 | 0.5466   | 127.9704       |
| 22       | 354.77 | 0.0193   | 2.7316         |
| 23       | 360.95 | 2.7174   | 6.9817         |
| 24       | 366.65 | 6.6904   | 10.4766        |
| 25       | 379.27 | 37.7560  | 117.9502       |
| 26       | 382.46 | 4.7962   | 0.7152         |
| 27       | 390.38 | 3.5211   | 5.9180         |
| 28       | 393.37 | 26.4813  | 0.6759         |
| 29       | 395.02 | 2.6255   | 125.5025       |
| 30       | 399.28 | 1.2323   | 8.0371         |
| 31       | 404.56 | 0.6264   | 8.4817         |
| 32       | 411.55 | 1.5539   | 11.7534        |
| 33       | 413.62 | 0.4697   | 63.1448        |
| 34       | 417.21 | 2.8184   | 16.9797        |
| 35       | 425.63 | 0.3552   | 10.8537        |
| 36       | 429.66 | 0.5403   | 78.2839        |
| 37       | 441.07 | 3.4033   | 60.9688        |
| 38       | 442.09 | 3.9306   | 36.3371        |
| 39       | 452.37 | 1.6632   | 9.7256         |
| 40       | 456.42 | 0.0077   | 61.4850        |
| 41       | 463.09 | 0.0399   | 0.7266         |
| 42       | 473.25 | 1.3977   | 2.2143         |
| 43       | 473.99 | 0.1441   | 23.3231        |
| 44       | 476.13 | 7.7725   | 3.7351         |
| 45       | 478.84 | 0.5700   | 13.2366        |
| 46       | 485.78 | 0.1041   | 0.5259         |
| 47       | 489.65 | 7.8165   | 34.4823        |
| 48       | 499.60 | 1.8286   | 31.9675        |
| 49       | 503.50 | 5.6504   | 71.6403        |
| 50       | 506.75 | 1.6247   | 6.3269         |
| 51       | 508.19 | 2.1785   | 9.7622         |
| 52       | 537.68 | 19.6131  | 93.5881        |

|     |         |         |           |
|-----|---------|---------|-----------|
| 53  | 568.34  | 9.5311  | 15.0190   |
| 54  | 571.38  | 0.0234  | 1.3155    |
| 55  | 585.65  | 10.2827 | 14.2651   |
| 56  | 589.04  | 1.2974  | 4.9613    |
| 57  | 599.66  | 0.0155  | 3.8757    |
| 58  | 607.24  | 24.4291 | 222.4198  |
| 59  | 609.21  | 0.2570  | 4.7042    |
| 60  | 627.34  | 4.9243  | 181.3523  |
| 61  | 631.23  | 0.6501  | 7.6905    |
| 62  | 632.32  | 0.2807  | 3.5913    |
| 63  | 640.61  | 8.9784  | 278.5630  |
| 64  | 658.32  | 1.1716  | 219.2229  |
| 65  | 658.65  | 0.8295  | 2.5810    |
| 66  | 668.56  | 3.7204  | 154.1197  |
| 67  | 671.77  | 10.1792 | 1128.3498 |
| 68  | 687.25  | 0.2210  | 21.3430   |
| 69  | 689.35  | 0.1534  | 336.3476  |
| 70  | 698.42  | 1.1021  | 55.4548   |
| 71  | 700.44  | 1.7118  | 227.7578  |
| 72  | 709.25  | 0.1691  | 2.8908    |
| 73  | 729.10  | 3.8749  | 382.0158  |
| 74  | 746.77  | 0.4259  | 12.6817   |
| 75  | 753.66  | 14.7953 | 23.0098   |
| 76  | 756.65  | 6.3373  | 233.4673  |
| 77  | 763.57  | 2.7628  | 8.9079    |
| 78  | 770.55  | 0.3396  | 13.3293   |
| 79  | 787.03  | 37.8487 | 43.8638   |
| 80  | 795.97  | 0.5184  | 16.1678   |
| 81  | 806.23  | 19.2039 | 54.0294   |
| 82  | 817.85  | 15.1458 | 17.4702   |
| 83  | 831.20  | 0.4197  | 6.6546    |
| 84  | 835.33  | 6.8094  | 97.5698   |
| 85  | 840.71  | 1.4746  | 6.6558    |
| 86  | 842.28  | 6.2135  | 14.6195   |
| 87  | 854.85  | 0.2120  | 20.7139   |
| 88  | 871.16  | 1.7007  | 30.3280   |
| 89  | 894.39  | 0.3250  | 9.6783    |
| 90  | 905.62  | 0.1067  | 5.3304    |
| 91  | 976.26  | 9.6489  | 77.4840   |
| 92  | 983.26  | 12.7063 | 0.5872    |
| 93  | 1016.16 | 0.1442  | 0.5271    |
| 94  | 1030.86 | 3.8888  | 0.8442    |
| 95  | 1034.53 | 9.1919  | 38.9794   |
| 96  | 1043.93 | 3.0652  | 1.0843    |
| 97  | 1095.97 | 21.5883 | 73.4265   |
| 98  | 1122.19 | 19.5373 | 53.2109   |
| 99  | 1124.71 | 58.2564 | 267.5584  |
| 100 | 1143.29 | 4.3159  | 20.9503   |
| 101 | 1155.57 | 0.5666  | 26.4369   |
| 102 | 1178.00 | 10.8342 | 196.4400  |
| 103 | 1182.58 | 31.0003 | 119.9316  |
| 104 | 1187.69 | 13.3977 | 86.6082   |
| 105 | 1203.89 | 16.8842 | 26.4963   |
| 106 | 1210.42 | 7.1487  | 72.3729   |
| 107 | 1229.66 | 20.2762 | 104.2854  |
| 108 | 1235.72 | 1.8384  | 136.1446  |

|     |         |          |          |
|-----|---------|----------|----------|
| 109 | 1239.37 | 16.6669  | 2.8958   |
| 110 | 1250.33 | 62.0952  | 9.6759   |
| 111 | 1256.93 | 90.5385  | 67.4823  |
| 112 | 1262.38 | 260.7747 | 175.5685 |
| 113 | 1269.84 | 6.7662   | 54.7259  |
| 114 | 1282.11 | 42.6934  | 27.5311  |
| 115 | 1284.50 | 205.5345 | 88.5566  |
| 116 | 1303.46 | 44.7074  | 104.2990 |
| 117 | 1314.10 | 44.5808  | 120.8735 |

Table S8. Predicted normal mode frequencies (cm<sup>-1</sup>) and the infrared and Raman activities for the Ag@B<sub>40</sub>.

| Mode # ▲ | Freq   | Infrared | Raman Activity |
|----------|--------|----------|----------------|
| 1        | 46.70  | 0.0038   | 0.4735         |
| 2        | 46.70  | 0.0038   | 0.4735         |
| 3        | 87.94  | 0.5418   | 0.1419         |
| 4        | 142.36 | 0.4541   | 62.2466        |
| 5        | 152.90 | 0.0000   | 111.8722       |
| 6        | 196.01 | 0.1418   | 3.7491         |
| 7        | 196.01 | 0.1418   | 3.7491         |
| 8        | 208.33 | 3.0531   | 7.4401         |
| 9        | 208.33 | 3.0531   | 7.4402         |
| 10       | 215.02 | 0.0000   | 0.0000         |
| 11       | 223.79 | 0.0000   | 3.3175         |
| 12       | 226.45 | 0.0000   | 31.3325        |
| 13       | 243.25 | 17.7366  | 117.5678       |
| 14       | 264.32 | 0.0000   | 98.3227        |
| 15       | 281.89 | 0.0000   | 0.0000         |
| 16       | 283.32 | 0.0066   | 6.9646         |
| 17       | 309.95 | 17.5974  | 29.9397        |
| 18       | 309.95 | 17.5974  | 29.9397        |
| 19       | 330.41 | 0.0000   | 1.8986         |
| 20       | 350.97 | 0.0000   | 43.4663        |
| 21       | 350.97 | 2.1939   | 2.1952         |
| 22       | 350.97 | 2.1939   | 2.1952         |
| 23       | 355.06 | 0.0000   | 0.0000         |
| 24       | 355.34 | 0.2655   | 18.5983        |
| 25       | 355.34 | 0.2655   | 18.5984        |
| 26       | 361.96 | 0.0000   | 132.5600       |
| 27       | 381.75 | 14.3367  | 26.9138        |
| 28       | 381.75 | 14.3366  | 26.9137        |
| 29       | 392.13 | 1.2159   | 16.6941        |
| 30       | 392.13 | 1.2159   | 16.6941        |
| 31       | 406.88 | 0.4131   | 8.3904         |
| 32       | 406.88 | 0.4131   | 8.3904         |
| 33       | 410.62 | 0.0000   | 0.0000         |
| 34       | 412.11 | 29.7597  | 31.9178        |
| 35       | 412.11 | 29.7597  | 31.9179        |
| 36       | 420.02 | 3.0571   | 26.3694        |
| 37       | 427.21 | 0.0000   | 133.2823       |
| 38       | 430.51 | 0.0000   | 52.6967        |
| 39       | 441.36 | 0.0000   | 0.0000         |
| 40       | 441.98 | 0.0000   | 98.6214        |
| 41       | 455.49 | 3.5711   | 0.0873         |
| 42       | 455.49 | 3.5711   | 0.0873         |
| 43       | 456.28 | 0.0000   | 162.6449       |
| 44       | 463.29 | 0.0000   | 0.0000         |
| 45       | 466.17 | 5.6307   | 6.4373         |
| 46       | 470.94 | 3.8407   | 35.1796        |
| 47       | 470.94 | 3.8407   | 35.1795        |
| 48       | 475.77 | 0.0000   | 42.3868        |
| 49       | 501.42 | 2.3881   | 0.8515         |
| 50       | 501.42 | 2.3881   | 0.8515         |
| 51       | 504.38 | 2.5657   | 0.0020         |
| 52       | 505.61 | 0.0000   | 21.7254        |

|     |         |         |          |
|-----|---------|---------|----------|
| 53  | 563.15  | 7.6560  | 69.2125  |
| 54  | 568.72  | 0.0000  | 4.2527   |
| 55  | 570.93  | 0.5377  | 0.0601   |
| 56  | 570.93  | 0.5377  | 0.0601   |
| 57  | 590.40  | 0.0000  | 0.0000   |
| 58  | 608.92  | 0.0000  | 40.9829  |
| 59  | 614.51  | 1.7334  | 8.4584   |
| 60  | 614.51  | 1.7334  | 8.4585   |
| 61  | 615.08  | 5.6398  | 3.7020   |
| 62  | 617.21  | 0.0000  | 0.0000   |
| 63  | 645.20  | 0.0000  | 92.4775  |
| 64  | 646.33  | 0.0000  | 158.0052 |
| 65  | 653.86  | 3.3396  | 0.1339   |
| 66  | 653.86  | 3.3396  | 0.1339   |
| 67  | 666.05  | 21.0851 | 102.6091 |
| 68  | 666.05  | 21.0851 | 102.6089 |
| 69  | 684.97  | 0.0000  | 23.0815  |
| 70  | 691.70  | 0.0597  | 109.8158 |
| 71  | 699.99  | 7.4799  | 17.4194  |
| 72  | 699.99  | 7.4799  | 17.4194  |
| 73  | 705.03  | 1.0710  | 187.5778 |
| 74  | 727.57  | 0.0000  | 0.0000   |
| 75  | 737.92  | 0.0002  | 3.4241   |
| 76  | 737.92  | 0.0002  | 3.4241   |
| 77  | 759.43  | 0.0000  | 425.8012 |
| 78  | 762.48  | 0.0000  | 53.8969  |
| 79  | 765.53  | 11.7315 | 42.0100  |
| 80  | 795.00  | 42.5031 | 3.6630   |
| 81  | 799.73  | 3.0035  | 10.0502  |
| 82  | 799.73  | 3.0035  | 10.0502  |
| 83  | 815.03  | 3.7631  | 22.8653  |
| 84  | 815.03  | 3.7631  | 22.8653  |
| 85  | 833.09  | 5.0642  | 49.7525  |
| 86  | 833.09  | 5.0642  | 49.7526  |
| 87  | 847.07  | 0.0000  | 2.1766   |
| 88  | 862.19  | 0.0000  | 5.2335   |
| 89  | 884.81  | 0.0000  | 0.0000   |
| 90  | 905.31  | 0.0000  | 1.5849   |
| 91  | 978.60  | 5.9270  | 4.5043   |
| 92  | 978.60  | 5.9270  | 4.5043   |
| 93  | 1011.00 | 0.0000  | 96.3508  |
| 94  | 1018.47 | 3.4789  | 27.1587  |
| 95  | 1018.47 | 3.4789  | 27.1587  |
| 96  | 1049.82 | 0.0000  | 0.0000   |
| 97  | 1081.31 | 2.5917  | 60.5613  |
| 98  | 1095.21 | 51.3969 | 73.3960  |
| 99  | 1095.21 | 51.3969 | 73.3958  |
| 100 | 1126.94 | 0.0000  | 35.0896  |
| 101 | 1163.85 | 0.0000  | 4.3946   |
| 102 | 1168.39 | 0.0000  | 9.2729   |
| 103 | 1175.57 | 46.7724 | 2.6757   |
| 104 | 1175.57 | 46.7724 | 2.6757   |
| 105 | 1176.84 | 1.6171  | 1.3276   |
| 106 | 1207.49 | 15.0228 | 16.5575  |
| 107 | 1207.49 | 15.0228 | 16.5575  |
| 108 | 1228.36 | 0.0000  | 0.0000   |

|     |         |          |          |
|-----|---------|----------|----------|
| 109 | 1228.90 | 0.0000   | 761.7176 |
| 110 | 1232.76 | 0.9994   | 8.6270   |
| 111 | 1232.76 | 0.9994   | 8.6270   |
| 112 | 1233.09 | 0.0000   | 0.0000   |
| 113 | 1245.01 | 81.9716  | 67.0924  |
| 114 | 1277.62 | 0.0000   | 652.3777 |
| 115 | 1278.05 | 159.3235 | 36.2202  |
| 116 | 1278.05 | 159.3235 | 36.2202  |
| 117 | 1306.72 | 0.0000   | 92.7047  |

Table S9. Predicted normal mode frequencies (cm<sup>-1</sup>) and the infrared and Raman activities for the Ag@B<sub>40</sub><sup>-</sup>.

| Mode # ▲ | Freq   | Infrared | Raman Activity |
|----------|--------|----------|----------------|
| 1        | 52.07  | 0.2853   | 0.0946         |
| 2        | 52.07  | 0.2853   | 0.0946         |
| 3        | 96.14  | 5.4023   | 47.2005        |
| 4        | 103.39 | 1.0492   | 1.6396         |
| 5        | 157.77 | 0.0000   | 79.1706        |
| 6        | 197.81 | 0.1503   | 11.7279        |
| 7        | 197.81 | 0.1503   | 11.7279        |
| 8        | 200.22 | 0.0000   | 0.0000         |
| 9        | 203.61 | 26.4499  | 46.5886        |
| 10       | 207.90 | 2.6572   | 7.7134         |
| 11       | 207.90 | 2.6572   | 7.7134         |
| 12       | 211.62 | 0.0000   | 23.5966        |
| 13       | 219.33 | 0.0000   | 3.9906         |
| 14       | 252.76 | 0.0000   | 103.0987       |
| 15       | 258.56 | 0.0000   | 0.0000         |
| 16       | 275.06 | 0.1898   | 0.3632         |
| 17       | 308.29 | 0.0000   | 2.2108         |
| 18       | 310.16 | 11.5278  | 0.5004         |
| 19       | 310.16 | 11.5278  | 0.5004         |
| 20       | 333.65 | 0.1213   | 4.5189         |
| 21       | 333.65 | 0.1213   | 4.5189         |
| 22       | 343.04 | 0.0000   | 14.9109        |
| 23       | 352.49 | 0.0000   | 0.0000         |
| 24       | 352.85 | 0.0000   | 24.7064        |
| 25       | 355.23 | 7.2838   | 26.1778        |
| 26       | 355.23 | 7.2838   | 26.1778        |
| 27       | 377.76 | 0.7479   | 18.5702        |
| 28       | 377.76 | 0.7479   | 18.5703        |
| 29       | 397.63 | 2.5338   | 0.1329         |
| 30       | 397.63 | 2.5338   | 0.1329         |
| 31       | 404.80 | 37.3623  | 0.6035         |
| 32       | 404.80 | 37.3623  | 0.6035         |
| 33       | 405.38 | 0.0000   | 0.0000         |
| 34       | 409.16 | 0.0000   | 65.5872        |
| 35       | 409.35 | 7.5229   | 46.0189        |
| 36       | 409.35 | 7.5229   | 46.0189        |
| 37       | 419.21 | 0.0000   | 0.0000         |
| 38       | 424.09 | 0.1472   | 11.8879        |
| 39       | 439.05 | 0.0000   | 85.0490        |
| 40       | 444.35 | 0.0000   | 25.5724        |
| 41       | 444.41 | 10.0856  | 0.1137         |
| 42       | 444.41 | 10.0856  | 0.1137         |
| 43       | 451.04 | 0.0000   | 173.6595       |
| 44       | 462.72 | 7.9378   | 0.0028         |
| 45       | 471.92 | 8.2472   | 22.0646        |
| 46       | 471.92 | 8.2472   | 22.0647        |
| 47       | 475.09 | 0.0000   | 14.9010        |
| 48       | 476.34 | 0.0000   | 0.0000         |
| 49       | 503.66 | 3.2105   | 0.3453         |
| 50       | 505.29 | 3.8064   | 0.4423         |
| 51       | 505.29 | 3.8064   | 0.4423         |
| 52       | 507.82 | 0.0000   | 3.5779         |

|     |         |         |          |
|-----|---------|---------|----------|
| 53  | 563.28  | 0.0000  | 1.1092   |
| 54  | 569.89  | 14.3254 | 27.2888  |
| 55  | 573.81  | 1.0006  | 0.1672   |
| 56  | 573.81  | 1.0006  | 0.1672   |
| 57  | 583.27  | 0.0000  | 0.0000   |
| 58  | 602.54  | 1.3355  | 1.1724   |
| 59  | 602.54  | 1.3355  | 1.1725   |
| 60  | 613.09  | 0.0000  | 0.0000   |
| 61  | 617.49  | 0.0000  | 25.9585  |
| 62  | 622.30  | 15.1001 | 2.1510   |
| 63  | 638.74  | 0.0000  | 159.2667 |
| 64  | 645.07  | 0.0000  | 114.1109 |
| 65  | 648.94  | 27.2224 | 28.2211  |
| 66  | 648.94  | 27.2224 | 28.2214  |
| 67  | 664.21  | 0.0348  | 35.2196  |
| 68  | 664.21  | 0.0348  | 35.2194  |
| 69  | 686.25  | 0.3625  | 78.1426  |
| 70  | 686.27  | 0.0000  | 31.3609  |
| 71  | 704.57  | 45.9708 | 13.7177  |
| 72  | 704.85  | 0.0000  | 0.0000   |
| 73  | 722.07  | 15.0503 | 35.5155  |
| 74  | 722.07  | 15.0504 | 35.5154  |
| 75  | 724.24  | 0.4361  | 5.0969   |
| 76  | 724.24  | 0.4361  | 5.0969   |
| 77  | 742.40  | 0.0000  | 16.4324  |
| 78  | 755.08  | 3.7856  | 24.4421  |
| 79  | 774.56  | 0.0000  | 212.9177 |
| 80  | 793.95  | 2.7044  | 0.2274   |
| 81  | 793.95  | 2.7044  | 0.2273   |
| 82  | 794.16  | 48.4162 | 6.9740   |
| 83  | 808.63  | 2.0964  | 17.4609  |
| 84  | 808.63  | 2.0964  | 17.4609  |
| 85  | 817.65  | 1.5838  | 60.6149  |
| 86  | 817.65  | 1.5838  | 60.6147  |
| 87  | 845.56  | 0.0000  | 4.1509   |
| 88  | 851.20  | 0.0000  | 0.5662   |
| 89  | 870.72  | 0.0000  | 0.0000   |
| 90  | 893.60  | 0.0000  | 11.3982  |
| 91  | 967.78  | 7.1119  | 0.6955   |
| 92  | 967.78  | 7.1119  | 0.6955   |
| 93  | 1002.93 | 0.0000  | 46.8688  |
| 94  | 1015.02 | 6.1238  | 6.9655   |
| 95  | 1015.02 | 6.1238  | 6.9655   |
| 96  | 1050.49 | 0.0000  | 0.0000   |
| 97  | 1080.77 | 0.1406  | 24.7499  |
| 98  | 1090.80 | 44.7172 | 55.8050  |
| 99  | 1090.80 | 44.7172 | 55.8052  |
| 100 | 1122.13 | 0.0000  | 34.8996  |
| 101 | 1155.55 | 0.0000  | 41.1132  |
| 102 | 1158.98 | 0.0000  | 30.1421  |
| 103 | 1168.61 | 49.4592 | 0.2018   |
| 104 | 1168.61 | 49.4592 | 0.2018   |
| 105 | 1172.05 | 0.4279  | 0.0161   |
| 106 | 1200.85 | 32.6128 | 13.6276  |
| 107 | 1200.85 | 32.6128 | 13.6276  |
| 108 | 1214.64 | 0.0000  | 197.7755 |



|     |         |          |          |
|-----|---------|----------|----------|
| 109 | 1217.05 | 0.0000   | 0.0000   |
| 110 | 1225.02 | 0.0000   | 0.0000   |
| 111 | 1225.97 | 1.2543   | 22.8839  |
| 112 | 1225.97 | 1.2543   | 22.8839  |
| 113 | 1239.01 | 64.4304  | 60.1108  |
| 114 | 1270.70 | 151.9197 | 38.2953  |
| 115 | 1270.70 | 151.9197 | 38.2953  |
| 116 | 1273.97 | 0.0000   | 101.8820 |
| 117 | 1298.65 | 0.0000   | 80.9276  |

Table S10. Predicted normal mode frequencies (cm<sup>-1</sup>) and the infrared and Raman activities for the Au&B<sub>40</sub>.

| Mode # ▲ | Freq   | Infrared | Raman Activity |
|----------|--------|----------|----------------|
| 1        | 33.96  | 0.1088   | 1.6288         |
| 2        | 35.04  | 0.1472   | 1.3700         |
| 3        | 99.05  | 0.0191   | 13.7793        |
| 4        | 175.00 | 0.0636   | 37.3408        |
| 5        | 187.89 | 0.4781   | 38.6674        |
| 6        | 199.18 | 0.0564   | 1.0849         |
| 7        | 214.38 | 0.3242   | 9.9203         |
| 8        | 214.66 | 0.0355   | 18.8850        |
| 9        | 221.52 | 0.6355   | 15.5322        |
| 10       | 238.38 | 0.0531   | 22.3854        |
| 11       | 244.53 | 0.0494   | 0.4211         |
| 12       | 255.46 | 2.7029   | 10.9972        |
| 13       | 272.99 | 0.0026   | 9.2564         |
| 14       | 279.34 | 1.1218   | 3.8451         |
| 15       | 305.01 | 0.0077   | 0.1061         |
| 16       | 322.14 | 1.4150   | 2.5631         |
| 17       | 324.61 | 4.5038   | 4.3416         |
| 18       | 342.20 | 0.1480   | 0.2435         |
| 19       | 343.38 | 1.0100   | 11.1332        |
| 20       | 350.25 | 0.0180   | 23.4417        |
| 21       | 357.41 | 0.8605   | 0.1508         |
| 22       | 359.79 | 0.7236   | 10.0747        |
| 23       | 365.35 | 2.2568   | 2.9306         |
| 24       | 372.99 | 8.5179   | 8.1051         |
| 25       | 384.36 | 23.3629  | 9.2172         |
| 26       | 386.55 | 0.2270   | 0.4270         |
| 27       | 393.30 | 0.0323   | 0.4386         |
| 28       | 394.14 | 5.7727   | 8.8792         |
| 29       | 397.48 | 19.2872  | 9.0292         |
| 30       | 401.44 | 5.5323   | 4.8326         |
| 31       | 406.95 | 0.8310   | 3.0215         |
| 32       | 411.13 | 0.0607   | 4.7512         |
| 33       | 417.34 | 0.5530   | 29.7600        |
| 34       | 419.04 | 0.8691   | 1.4534         |
| 35       | 425.76 | 3.5088   | 14.1750        |
| 36       | 429.50 | 0.2362   | 74.7737        |
| 37       | 435.81 | 2.1002   | 4.4855         |
| 38       | 438.38 | 0.2861   | 15.2999        |
| 39       | 454.16 | 0.0907   | 0.2357         |
| 40       | 456.92 | 0.0630   | 54.7839        |
| 41       | 464.99 | 0.0442   | 0.5276         |
| 42       | 471.45 | 0.9895   | 0.9900         |
| 43       | 473.92 | 2.8030   | 0.5969         |
| 44       | 476.26 | 0.6563   | 2.5520         |
| 45       | 478.99 | 0.7295   | 8.4942         |
| 46       | 485.29 | 0.5613   | 3.5606         |
| 47       | 495.00 | 0.5703   | 8.7705         |
| 48       | 498.35 | 1.4932   | 2.1746         |
| 49       | 505.23 | 3.4869   | 2.4636         |
| 50       | 505.70 | 0.0503   | 10.2074        |
| 51       | 509.41 | 0.3283   | 17.4575        |
| 52       | 559.43 | 12.9570  | 7.4360         |

|     |         |         |          |
|-----|---------|---------|----------|
| 53  | 565.33  | 8.3709  | 4.2680   |
| 54  | 573.24  | 0.1147  | 0.4909   |
| 55  | 583.37  | 4.0354  | 7.7060   |
| 56  | 586.13  | 1.1087  | 4.0893   |
| 57  | 605.21  | 10.6389 | 10.7620  |
| 58  | 605.22  | 1.2725  | 1.3869   |
| 59  | 617.64  | 0.0549  | 1.4501   |
| 60  | 626.20  | 0.0358  | 4.0924   |
| 61  | 628.66  | 0.1613  | 1.3584   |
| 62  | 631.85  | 2.1601  | 27.1126  |
| 63  | 639.31  | 0.5681  | 33.2972  |
| 64  | 657.43  | 0.0079  | 0.4031   |
| 65  | 658.34  | 0.5021  | 104.6621 |
| 66  | 663.14  | 0.4576  | 1.9810   |
| 67  | 688.27  | 0.3015  | 2.7582   |
| 68  | 688.95  | 0.5457  | 11.9375  |
| 69  | 697.74  | 3.1836  | 37.1912  |
| 70  | 705.36  | 8.8688  | 33.9672  |
| 71  | 707.31  | 3.9229  | 32.1866  |
| 72  | 707.59  | 0.9922  | 0.3674   |
| 73  | 731.01  | 38.7302 | 175.8170 |
| 74  | 752.58  | 1.8083  | 25.0857  |
| 75  | 753.31  | 2.9457  | 0.0757   |
| 76  | 762.95  | 2.0257  | 9.5423   |
| 77  | 767.18  | 0.5714  | 60.0514  |
| 78  | 776.88  | 0.5022  | 3.3764   |
| 79  | 789.58  | 31.8580 | 11.6464  |
| 80  | 800.79  | 2.3872  | 6.2224   |
| 81  | 801.93  | 1.8440  | 4.7682   |
| 82  | 818.71  | 22.0704 | 13.2826  |
| 83  | 837.20  | 0.1306  | 5.4519   |
| 84  | 841.66  | 3.7137  | 28.6821  |
| 85  | 848.61  | 4.0650  | 1.5536   |
| 86  | 852.61  | 1.9560  | 5.5373   |
| 87  | 857.26  | 0.0681  | 7.4889   |
| 88  | 875.67  | 0.1299  | 14.0260  |
| 89  | 905.41  | 0.1110  | 3.7257   |
| 90  | 916.51  | 0.0001  | 6.2076   |
| 91  | 979.03  | 3.2475  | 1.2256   |
| 92  | 991.41  | 10.4144 | 0.2173   |
| 93  | 1020.24 | 0.3257  | 6.4209   |
| 94  | 1036.44 | 7.6829  | 0.1077   |
| 95  | 1040.82 | 6.4067  | 34.6278  |
| 96  | 1046.73 | 0.8995  | 1.1517   |
| 97  | 1099.57 | 16.2454 | 1.7662   |
| 98  | 1123.98 | 4.4057  | 27.1435  |
| 99  | 1131.68 | 19.2000 | 2.3102   |
| 100 | 1147.53 | 3.7250  | 24.3928  |
| 101 | 1157.77 | 0.9018  | 1.0483   |
| 102 | 1185.03 | 2.5723  | 103.0027 |
| 103 | 1189.54 | 3.5206  | 26.0034  |
| 104 | 1199.67 | 6.7967  | 6.5817   |
| 105 | 1205.46 | 10.7303 | 8.4635   |
| 106 | 1216.98 | 4.9324  | 28.4218  |
| 107 | 1230.32 | 25.4054 | 44.3590  |
| 108 | 1243.16 | 20.0511 | 7.4209   |

|     |         |          |          |
|-----|---------|----------|----------|
| 109 | 1252.24 | 0.3805   | 37.4971  |
| 110 | 1257.84 | 70.3966  | 53.9763  |
| 111 | 1258.19 | 83.1406  | 3.5865   |
| 112 | 1271.43 | 155.3538 | 104.6838 |
| 113 | 1274.98 | 3.2343   | 7.3331   |
| 114 | 1290.48 | 46.3094  | 50.2907  |
| 115 | 1290.89 | 27.4580  | 24.7532  |
| 116 | 1308.27 | 22.5966  | 47.7318  |
| 117 | 1319.66 | 5.4984   | 188.2054 |

Table S11. Predicted normal mode frequencies (cm<sup>-1</sup>) and the infrared and Raman activities for the Au&B<sub>40</sub><sup>-</sup>.

| Mode # ▲ | Freq   | Infrared | Raman Activity |
|----------|--------|----------|----------------|
| 1        | 43.81  | 0.4557   | 2.1046         |
| 2        | 46.40  | 0.5745   | 2.5556         |
| 3        | 102.64 | 0.0226   | 10.4149        |
| 4        | 172.96 | 0.2663   | 57.4945        |
| 5        | 183.56 | 0.9872   | 43.1120        |
| 6        | 200.80 | 0.1635   | 2.0612         |
| 7        | 212.74 | 2.6319   | 12.9902        |
| 8        | 217.40 | 0.1015   | 18.2586        |
| 9        | 224.29 | 0.1051   | 29.3542        |
| 10       | 235.36 | 0.1180   | 23.0094        |
| 11       | 243.25 | 3.3736   | 13.2508        |
| 12       | 245.38 | 0.1459   | 2.8629         |
| 13       | 270.37 | 0.0039   | 10.8481        |
| 14       | 272.96 | 1.8604   | 5.8055         |
| 15       | 298.46 | 0.2415   | 1.0329         |
| 16       | 315.87 | 1.6527   | 4.4249         |
| 17       | 327.15 | 5.4011   | 41.8352        |
| 18       | 342.05 | 0.0501   | 0.3917         |
| 19       | 345.62 | 4.9523   | 20.1919        |
| 20       | 347.48 | 1.3901   | 7.5290         |
| 21       | 349.59 | 0.3378   | 57.0814        |
| 22       | 357.85 | 0.0798   | 3.4644         |
| 23       | 361.27 | 3.8358   | 2.9953         |
| 24       | 368.96 | 7.2581   | 11.2096        |
| 25       | 381.14 | 35.5250  | 43.0582        |
| 26       | 382.71 | 2.5055   | 1.3918         |
| 27       | 392.52 | 1.7433   | 2.3835         |
| 28       | 395.31 | 27.7063  | 1.6113         |
| 29       | 396.32 | 3.8646   | 21.9609        |
| 30       | 400.65 | 0.0608   | 29.2768        |
| 31       | 404.61 | 2.4677   | 14.6676        |
| 32       | 411.54 | 1.8164   | 6.1511         |
| 33       | 416.91 | 0.2726   | 39.6648        |
| 34       | 418.61 | 3.0459   | 6.4585         |
| 35       | 426.31 | 0.1037   | 16.6898        |
| 36       | 429.94 | 0.6334   | 60.2489        |
| 37       | 441.02 | 4.4051   | 39.0544        |
| 38       | 443.16 | 0.3770   | 7.8974         |
| 39       | 454.83 | 0.2108   | 52.8426        |
| 40       | 456.29 | 0.5490   | 5.9635         |
| 41       | 465.53 | 0.0361   | 0.2718         |
| 42       | 471.85 | 2.5751   | 1.5696         |
| 43       | 474.63 | 0.9061   | 5.5315         |
| 44       | 477.60 | 4.4494   | 1.1767         |
| 45       | 480.76 | 0.8726   | 10.9494        |
| 46       | 487.24 | 0.1071   | 1.3474         |
| 47       | 494.29 | 6.1338   | 11.5670        |
| 48       | 500.18 | 2.8046   | 10.3008        |
| 49       | 505.88 | 1.0722   | 8.3704         |
| 50       | 506.05 | 2.1560   | 21.4384        |
| 51       | 506.47 | 2.2308   | 17.0221        |
| 52       | 548.83 | 16.1119  | 7.2996         |

|     |         |         |          |
|-----|---------|---------|----------|
| 53  | 568.04  | 0.5181  | 1.7339   |
| 54  | 570.06  | 13.1113 | 16.0920  |
| 55  | 587.19  | 8.5085  | 5.9230   |
| 56  | 589.28  | 2.3951  | 5.4196   |
| 57  | 599.88  | 0.3456  | 1.3772   |
| 58  | 601.79  | 27.2985 | 25.0237  |
| 59  | 610.68  | 0.5023  | 3.3710   |
| 60  | 630.70  | 0.8940  | 10.0679  |
| 61  | 631.16  | 1.5437  | 16.4297  |
| 62  | 634.04  | 0.0849  | 2.9822   |
| 63  | 639.34  | 5.8394  | 41.5188  |
| 64  | 655.50  | 1.1181  | 113.9974 |
| 65  | 655.97  | 0.7717  | 38.5556  |
| 66  | 665.89  | 1.8344  | 2.6294   |
| 67  | 686.89  | 4.3336  | 12.4112  |
| 68  | 686.95  | 2.1112  | 9.6950   |
| 69  | 694.72  | 3.4027  | 57.6751  |
| 70  | 697.49  | 5.8784  | 22.3995  |
| 71  | 708.30  | 0.1132  | 3.0963   |
| 72  | 718.02  | 50.0992 | 301.2864 |
| 73  | 736.91  | 48.8200 | 427.4050 |
| 74  | 739.73  | 2.5643  | 19.3620  |
| 75  | 755.13  | 13.5874 | 19.4023  |
| 76  | 758.84  | 4.7151  | 49.1793  |
| 77  | 767.35  | 3.5397  | 20.4856  |
| 78  | 776.03  | 2.8183  | 2.9714   |
| 79  | 789.28  | 29.9506 | 46.1283  |
| 80  | 796.60  | 0.6740  | 7.4226   |
| 81  | 807.55  | 21.1409 | 35.2517  |
| 82  | 819.66  | 26.3049 | 7.0245   |
| 83  | 832.80  | 0.4653  | 4.6595   |
| 84  | 839.13  | 8.4676  | 84.2820  |
| 85  | 843.72  | 2.3215  | 3.5731   |
| 86  | 845.63  | 4.7152  | 9.3581   |
| 87  | 855.10  | 0.1996  | 19.8738  |
| 88  | 872.39  | 2.0341  | 28.9535  |
| 89  | 894.97  | 0.1377  | 9.7608   |
| 90  | 907.17  | 0.0097  | 4.4941   |
| 91  | 975.37  | 11.4667 | 38.9978  |
| 92  | 984.34  | 11.4058 | 0.7089   |
| 93  | 1017.33 | 0.6248  | 0.2055   |
| 94  | 1031.09 | 6.5859  | 0.1395   |
| 95  | 1035.25 | 12.8367 | 22.6597  |
| 96  | 1036.72 | 3.9776  | 2.3181   |
| 97  | 1095.37 | 22.4393 | 14.8507  |
| 98  | 1116.31 | 27.3770 | 15.7662  |
| 99  | 1126.10 | 74.3025 | 36.3669  |
| 100 | 1143.52 | 5.2738  | 21.5522  |
| 101 | 1156.56 | 0.9085  | 3.9910   |
| 102 | 1179.99 | 0.8912  | 136.1901 |
| 103 | 1185.01 | 18.6481 | 31.6976  |
| 104 | 1189.16 | 29.5421 | 40.4914  |
| 105 | 1204.42 | 16.6971 | 5.7240   |
| 106 | 1211.00 | 5.7617  | 36.6827  |
| 107 | 1228.63 | 7.8998  | 79.1701  |
| 108 | 1240.03 | 0.7429  | 48.6030  |

|     |         |          |          |
|-----|---------|----------|----------|
| 109 | 1241.68 | 30.1510  | 40.5008  |
| 110 | 1252.88 | 71.3542  | 3.7579   |
| 111 | 1259.57 | 52.5037  | 30.0826  |
| 112 | 1268.14 | 272.4232 | 26.4921  |
| 113 | 1275.27 | 2.8733   | 44.7575  |
| 114 | 1285.22 | 32.7243  | 21.8988  |
| 115 | 1287.14 | 171.1163 | 61.8538  |
| 116 | 1304.77 | 37.2177  | 75.0559  |
| 117 | 1316.04 | 21.9351  | 145.3281 |

Table S12. Predicted normal mode frequencies (cm<sup>-1</sup>) and the infrared and Raman activities for the Au@B<sub>40</sub>.

| Mode # | Freq   | Infrared | Raman Activity |
|--------|--------|----------|----------------|
| 1      | 24.92  | 0.0047   | 0.0455         |
| 2      | 24.92  | 0.0047   | 0.0455         |
| 3      | 41.57  | 0.2423   | 0.0080         |
| 4      | 155.67 | 2.6118   | 40.8301        |
| 5      | 157.48 | 0.0000   | 32.8989        |
| 6      | 162.15 | 1.1506   | 0.8292         |
| 7      | 162.15 | 1.1506   | 0.8292         |
| 8      | 194.59 | 0.2165   | 2.6371         |
| 9      | 194.59 | 0.2165   | 2.6371         |
| 10     | 197.61 | 0.0000   | 0.0000         |
| 11     | 204.23 | 0.0000   | 2.6319         |
| 12     | 222.81 | 0.0000   | 2.8103         |
| 13     | 224.29 | 13.9792  | 0.1130         |
| 14     | 251.41 | 0.0000   | 5.3989         |
| 15     | 275.52 | 0.0000   | 0.0000         |
| 16     | 276.18 | 1.0342   | 1.3995         |
| 17     | 286.09 | 2.1869   | 7.9167         |
| 18     | 286.09 | 2.1869   | 7.9167         |
| 19     | 310.21 | 0.0000   | 5.0316         |
| 20     | 321.55 | 0.0000   | 26.3378        |
| 21     | 331.78 | 0.1892   | 0.1675         |
| 22     | 331.78 | 0.1892   | 0.1675         |
| 23     | 338.42 | 39.8924  | 14.0560        |
| 24     | 338.42 | 39.8924  | 14.0560        |
| 25     | 341.07 | 0.0000   | 0.0000         |
| 26     | 341.40 | 0.0000   | 16.0891        |
| 27     | 349.05 | 7.4518   | 0.0815         |
| 28     | 349.05 | 7.4518   | 0.0815         |
| 29     | 371.11 | 0.0000   | 0.0000         |
| 30     | 371.50 | 0.1458   | 14.5612        |
| 31     | 371.50 | 0.1458   | 14.5612        |
| 32     | 386.86 | 2.4336   | 4.1242         |
| 33     | 386.86 | 2.4336   | 4.1242         |
| 34     | 407.94 | 0.0000   | 5.2775         |
| 35     | 408.05 | 7.5887   | 26.5158        |
| 36     | 415.44 | 0.0103   | 1.3906         |
| 37     | 415.44 | 0.0103   | 1.3906         |
| 38     | 427.90 | 0.0000   | 51.8623        |
| 39     | 431.91 | 0.0000   | 0.3103         |
| 40     | 446.15 | 0.0000   | 86.6676        |
| 41     | 454.30 | 0.0000   | 0.0000         |
| 42     | 455.12 | 2.2643   | 0.1968         |
| 43     | 461.52 | 0.0000   | 18.2280        |
| 44     | 470.15 | 1.5831   | 0.3454         |
| 45     | 470.15 | 1.5831   | 0.3454         |
| 46     | 472.09 | 0.0000   | 0.0000         |
| 47     | 478.14 | 0.7558   | 7.6863         |
| 48     | 478.14 | 0.7558   | 7.6864         |
| 49     | 494.78 | 0.7404   | 1.7883         |
| 50     | 496.09 | 1.9332   | 1.9741         |
| 51     | 496.09 | 1.9332   | 1.9741         |
| 52     | 506.57 | 0.0000   | 60.5591        |



|     |         |         |         |
|-----|---------|---------|---------|
| 53  | 552.47  | 7.4371  | 3.4640  |
| 54  | 566.61  | 0.0000  | 0.0494  |
| 55  | 575.78  | 3.5603  | 11.2048 |
| 56  | 575.78  | 3.5603  | 11.2048 |
| 57  | 601.46  | 0.0000  | 0.0000  |
| 58  | 608.99  | 22.3417 | 0.0946  |
| 59  | 611.34  | 0.0000  | 0.0000  |
| 60  | 616.20  | 0.6594  | 0.5640  |
| 61  | 616.20  | 0.6594  | 0.5640  |
| 62  | 616.44  | 0.0000  | 3.8205  |
| 63  | 632.84  | 0.0000  | 73.1762 |
| 64  | 643.81  | 0.4398  | 0.3622  |
| 65  | 643.81  | 0.4398  | 0.3622  |
| 66  | 650.38  | 0.0000  | 76.8910 |
| 67  | 671.44  | 0.0033  | 0.0137  |
| 68  | 671.44  | 0.0033  | 0.0137  |
| 69  | 679.10  | 0.0000  | 46.1332 |
| 70  | 689.51  | 7.5565  | 11.5895 |
| 71  | 696.82  | 9.2340  | 21.8976 |
| 72  | 698.86  | 0.4424  | 0.0322  |
| 73  | 698.86  | 0.4424  | 0.0321  |
| 74  | 737.58  | 0.0000  | 11.1885 |
| 75  | 747.46  | 4.9869  | 2.2272  |
| 76  | 747.46  | 4.9869  | 2.2272  |
| 77  | 757.72  | 0.0000  | 0.0000  |
| 78  | 770.56  | 0.0000  | 1.0911  |
| 79  | 774.28  | 22.7953 | 10.1355 |
| 80  | 793.73  | 6.6161  | 5.1493  |
| 81  | 800.43  | 8.9462  | 17.6604 |
| 82  | 800.43  | 8.9462  | 17.6604 |
| 83  | 820.66  | 5.5799  | 2.2852  |
| 84  | 820.66  | 5.5799  | 2.2852  |
| 85  | 838.12  | 0.0000  | 9.5237  |
| 86  | 839.67  | 0.3606  | 3.3565  |
| 87  | 839.67  | 0.3606  | 3.3565  |
| 88  | 860.31  | 0.0000  | 21.0047 |
| 89  | 887.41  | 0.0000  | 0.0000  |
| 90  | 907.02  | 0.0000  | 10.5943 |
| 91  | 976.82  | 4.5169  | 0.1262  |
| 92  | 976.82  | 4.5169  | 0.1262  |
| 93  | 1007.62 | 0.0000  | 1.8333  |
| 94  | 1021.10 | 8.8935  | 0.3089  |
| 95  | 1021.10 | 8.8935  | 0.3089  |
| 96  | 1033.91 | 0.0000  | 0.0000  |
| 97  | 1077.45 | 16.4693 | 0.3554  |
| 98  | 1125.36 | 0.0000  | 55.8473 |
| 99  | 1130.44 | 11.6217 | 0.5946  |
| 100 | 1130.44 | 11.6217 | 0.5946  |
| 101 | 1158.75 | 0.0000  | 0.0047  |
| 102 | 1169.16 | 0.0000  | 38.8915 |
| 103 | 1174.00 | 13.5837 | 16.0843 |
| 104 | 1179.39 | 11.4936 | 0.7578  |
| 105 | 1179.39 | 11.4936 | 0.7578  |
| 106 | 1212.66 | 0.0000  | 0.0000  |
| 107 | 1220.54 | 30.5068 | 0.1886  |
| 108 | 1220.54 | 30.5068 | 0.1886  |

|     |         |          |          |
|-----|---------|----------|----------|
| 109 | 1225.25 | 0.0000   | 17.2550  |
| 110 | 1233.27 | 97.6870  | 31.0998  |
| 111 | 1246.69 | 0.0000   | 0.0000   |
| 112 | 1246.75 | 175.8987 | 6.5879   |
| 113 | 1246.75 | 175.8987 | 6.5879   |
| 114 | 1275.70 | 0.0000   | 30.5867  |
| 115 | 1290.86 | 5.7017   | 15.7698  |
| 116 | 1290.86 | 5.7017   | 15.7698  |
| 117 | 1303.72 | 0.0000   | 217.8701 |

Table S13. Predicted normal mode frequencies (cm<sup>-1</sup>) and the infrared and Raman activities for the Au@B<sub>40</sub><sup>-</sup>.

| Mode # | Freq   | Infrared | Raman Activity |
|--------|--------|----------|----------------|
| 1      | 66.58  | 0.0018   | 0.0289         |
| 2      | 77.31  | 1.2489   | 2.0152         |
| 3      | 87.66  | 2.7487   | 2.5637         |
| 4      | 147.06 | 15.5233  | 2.1010         |
| 5      | 151.19 | 3.8262   | 10.2311        |
| 6      | 177.46 | 0.0067   | 22.6894        |
| 7      | 183.95 | 5.9695   | 11.6164        |
| 8      | 189.96 | 1.9927   | 29.6314        |
| 9      | 192.42 | 0.0373   | 2.2156         |
| 10     | 216.05 | 0.1955   | 5.2674         |
| 11     | 226.87 | 1.1268   | 19.0406        |
| 12     | 235.32 | 0.2020   | 4.7024         |
| 13     | 255.27 | 4.3274   | 2.1783         |
| 14     | 259.22 | 4.1312   | 5.8647         |
| 15     | 280.62 | 18.0036  | 0.4541         |
| 16     | 288.65 | 0.1806   | 2.5161         |
| 17     | 289.93 | 25.4529  | 15.3627        |
| 18     | 304.48 | 0.1390   | 4.6732         |
| 19     | 309.58 | 1.8413   | 10.1302        |
| 20     | 319.00 | 0.8134   | 16.1632        |
| 21     | 323.62 | 7.2458   | 9.6736         |
| 22     | 332.82 | 6.6468   | 8.1557         |
| 23     | 344.11 | 8.1546   | 11.1158        |
| 24     | 350.33 | 0.0963   | 9.8097         |
| 25     | 357.55 | 3.8633   | 3.3731         |
| 26     | 366.41 | 1.6600   | 10.2532        |
| 27     | 367.47 | 35.8582  | 0.7630         |
| 28     | 372.32 | 0.1889   | 0.3994         |
| 29     | 386.79 | 11.4971  | 6.1171         |
| 30     | 391.43 | 0.3965   | 2.4414         |
| 31     | 397.41 | 0.2727   | 3.8066         |
| 32     | 398.08 | 0.5944   | 2.3688         |
| 33     | 401.29 | 2.7411   | 60.3822        |
| 34     | 409.27 | 16.7991  | 10.5773        |
| 35     | 421.43 | 1.5517   | 55.2214        |
| 36     | 428.49 | 0.2765   | 0.5991         |
| 37     | 429.99 | 0.5029   | 10.1778        |
| 38     | 438.51 | 0.0802   | 0.5922         |
| 39     | 443.90 | 0.8247   | 8.2353         |
| 40     | 445.60 | 1.7409   | 15.2973        |
| 41     | 450.51 | 2.4076   | 29.5073        |
| 42     | 455.26 | 0.9255   | 52.1424        |
| 43     | 460.32 | 0.0073   | 0.6612         |
| 44     | 467.51 | 0.3353   | 5.9114         |
| 45     | 467.71 | 0.5338   | 1.4587         |
| 46     | 475.14 | 15.2585  | 19.1240        |
| 47     | 479.94 | 6.3171   | 0.8274         |
| 48     | 489.12 | 0.0304   | 5.0116         |
| 49     | 496.85 | 5.7718   | 8.3182         |
| 50     | 502.18 | 0.3376   | 5.7941         |
| 51     | 504.23 | 4.1579   | 3.3384         |
| 52     | 509.92 | 1.8715   | 13.7316        |

|     |         |          |         |
|-----|---------|----------|---------|
| 53  | 538.02  | 0.9326   | 5.6515  |
| 54  | 542.94  | 12.1880  | 5.7957  |
| 55  | 568.71  | 0.1461   | 3.8599  |
| 56  | 577.29  | 1.8004   | 7.6725  |
| 57  | 577.75  | 9.9408   | 14.5556 |
| 58  | 581.44  | 2.0825   | 7.1227  |
| 59  | 594.85  | 0.2709   | 1.1461  |
| 60  | 615.17  | 0.9410   | 1.7078  |
| 61  | 616.77  | 10.4705  | 3.3057  |
| 62  | 618.25  | 18.1725  | 6.8860  |
| 63  | 631.32  | 0.2750   | 2.0001  |
| 64  | 640.19  | 5.0054   | 7.1233  |
| 65  | 645.52  | 0.3895   | 73.2691 |
| 66  | 648.81  | 1.8647   | 0.2132  |
| 67  | 654.75  | 0.0291   | 0.7866  |
| 68  | 656.29  | 0.6150   | 5.5329  |
| 69  | 667.56  | 7.9990   | 36.7354 |
| 70  | 676.99  | 7.6659   | 3.6802  |
| 71  | 690.59  | 0.5884   | 0.5199  |
| 72  | 691.78  | 1.2732   | 26.2364 |
| 73  | 706.22  | 0.1225   | 0.9590  |
| 74  | 707.51  | 3.2981   | 16.9160 |
| 75  | 711.64  | 4.5240   | 11.7234 |
| 76  | 731.13  | 1.6516   | 12.3848 |
| 77  | 738.57  | 7.6053   | 17.1303 |
| 78  | 749.91  | 10.6459  | 12.0409 |
| 79  | 765.27  | 0.1096   | 1.3495  |
| 80  | 777.81  | 22.9312  | 4.1256  |
| 81  | 782.45  | 8.7928   | 3.6175  |
| 82  | 794.33  | 7.0337   | 16.6455 |
| 83  | 794.74  | 11.3882  | 16.9177 |
| 84  | 821.93  | 10.2878  | 19.3184 |
| 85  | 830.98  | 1.9992   | 4.1408  |
| 86  | 831.34  | 1.4457   | 11.7468 |
| 87  | 841.40  | 1.1810   | 13.8894 |
| 88  | 844.60  | 1.7061   | 22.4799 |
| 89  | 872.48  | 0.0292   | 2.9412  |
| 90  | 888.92  | 0.8977   | 8.1747  |
| 91  | 937.53  | 1.5023   | 1.6342  |
| 92  | 951.17  | 9.7813   | 3.8946  |
| 93  | 987.02  | 1.0720   | 3.9733  |
| 94  | 987.26  | 9.2504   | 1.7912  |
| 95  | 1012.68 | 20.6128  | 1.3175  |
| 96  | 1017.28 | 10.2902  | 3.4658  |
| 97  | 1028.53 | 15.8235  | 2.6299  |
| 98  | 1087.52 | 7.3810   | 24.1442 |
| 99  | 1114.05 | 9.0258   | 1.7483  |
| 100 | 1124.19 | 0.1619   | 0.0130  |
| 101 | 1125.97 | 2.1217   | 39.8079 |
| 102 | 1148.46 | 16.8617  | 17.6822 |
| 103 | 1160.62 | 10.5318  | 31.6818 |
| 104 | 1165.44 | 3.2328   | 5.0541  |
| 105 | 1179.96 | 50.0991  | 30.6854 |
| 106 | 1197.47 | 9.0671   | 6.5351  |
| 107 | 1205.80 | 5.5172   | 44.4709 |
| 108 | 1216.76 | 144.4773 | 13.4209 |

|     |         |          |          |
|-----|---------|----------|----------|
| 109 | 1218.74 | 5.7330   | 4.7198   |
| 110 | 1220.07 | 0.1979   | 7.7783   |
| 111 | 1226.69 | 113.5062 | 5.9668   |
| 112 | 1253.64 | 54.5267  | 42.1588  |
| 113 | 1259.30 | 73.9136  | 5.5909   |
| 114 | 1281.71 | 0.2263   | 41.1887  |
| 115 | 1294.19 | 28.3925  | 23.6992  |
| 116 | 1298.61 | 0.1721   | 17.5009  |
| 117 | 1305.77 | 7.5714   | 280.9995 |
